# Supplementary material for: A facile approach to β-amino acid derivatives via palladium-catalyzed hydrocarboxylation of enimides with formic acid
Source: Royal Society of Chemistry journal article supplement (doi:10.1039/c5ob01304f), 2015-01-01

# A Facile Approach to $\beta$ -Amino Acid Derivatives via Palladium-Catalyzed Hydrocarboxylation of Enimides with Formic Acid

Jie Dai,<sup>a</sup> Wenlong Ren,<sup>a</sup> Haining Wang,<sup>a</sup> and Yian Shi<sup>\*,a,b,c</sup>

<sup>a</sup>State Key Laboratory of Coordination Chemistry, Collaborative Innovation Center of Chemistry for Life Sciences, Center for Multimolecular Organic Chemistry, School of Chemistry and Chemical Engineering, Nanjing University, Nanjing, 210093, China; <sup>b</sup>Beijing National Laboratory for Molecular Sciences, CAS Key Laboratory of Molecular Recognition and Function, Institute of Chemistry, Chinese Academy of Sciences, Beijing 100190, China; <sup>c</sup>Department of Chemistry, Colorado State University, Fort Collins, Colorado 80523, United States.

## Supporting Information

### Table of Contents

|                                                   |      |
|---------------------------------------------------|------|
| Experimental procedures and characterization data | S-2  |
| X-ray structure of <b>2a</b>                      | S-9  |
| NMR spectra                                       | S-21 |

**General Methods.** All commercially available reagents were used without further purification. All solvents used for the reaction were purified with solvent purification system. Column chromatography was performed on silica gel (200-300 mesh). <sup>1</sup>H NMR spectra were recorded on a 400 MHz NMR spectrometer and <sup>13</sup>C NMR spectra were recorded on a 100 MHz NMR spectrometer. IR spectra were recorded on a FT-IR spectrometer. Melting points were uncorrected. Compound **1a** was purchased from the commercial supplier and other enimides were synthesized according to the literature procedures.<sup>1,2</sup>

- 1) V. I. Timokhin, N. R. Anastasi, S. S. Stahl, *J. Am. Chem. Soc.*, 2003, **125**, 12996.
- 2) J. L. Brice, J. E. Harang, V. I. Timokhin, N. R. Anastasi, S. S. Stahl, *J. Am. Chem. Soc.*, 2005, **127**, 2868.

**Representative procedure for hydrocarboxylation (Table 2, 2b).** To a mixture of ( $\eta^3$ -C<sub>3</sub>H<sub>5</sub>)<sub>2</sub>Pd<sub>2</sub>Cl<sub>2</sub> (0.00090 g, 0.0025 mmol), **L3** (0.0054 g, 0.010 mmol), and toluene (0.50 mL) in a vial (5.0 mL) were added enimide **1b** (0.1146 g, 0.50 mmol), HCOOPh (0.0122 g, 0.10 mmol) and HCOOH (0.046 g, 1.00 mmol) successively via syringe. The vial was purged with Ar to remove the air and tightly sealed with a septum cap. The reaction mixture was stirred at 80 °C for 24 h, cooled to rt, and purified by flash chromatography (silica gel, eluent: petroleum ether/ethyl acetate/HOAc = 10/1/0.11) to give compound **2b** as a light yellow solid (0.1283 g, 93% yield).

**Table 2, 2a**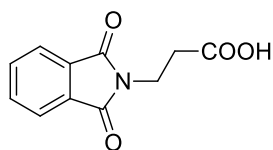

Yellow solid; mp. 161-163°C; IR (film) 3062, 1770, 1709, 1393  $\text{cm}^{-1}$ ;  $^1\text{H}$  NMR (400 MHz,  $\text{CDCl}_3$ )  $\delta$  7.88-7.83 (m, 2H), 7.75-7.70 (m, 2H), 4.01 (t,  $J = 7.3$  Hz, 2H), 2.80 (t,  $J = 7.3$  Hz, 2H);  $^{13}\text{C}$  NMR (100 MHz,  $\text{CDCl}_3$ )  $\delta$  176.3, 168.2, 134.3, 132.2, 123.6, 33.6, 32.7; HRMS (ESI) Calcd for  $\text{C}_{11}\text{H}_9\text{NNaO}_4$  (M+Na): 242.0424; Found: 242.0422.

E. Guénin, M. Monteil, N. Bouchemal, T. Prangé, M. Lecouvey, *Eur. J. Org. Chem.*, 2007, 3380.

**Table 2, 2b**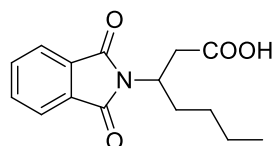

Yellow solid; mp. 118-119 °C; IR (film) 3225, 1773, 1706, 722  $\text{cm}^{-1}$ ;  $^1\text{H}$  NMR (400 MHz,  $\text{CDCl}_3$ )  $\delta$  7.84-7.79 (m, 2H), 7.74-7.68 (m, 2H), 4.66-4.58 (m, 1H), 3.20 (dd,  $J = 16.5$ , 9.2 Hz, 1H), 2.81 (dd,  $J = 16.5$ , 5.4 Hz, 1H), 2.11-1.98 (m, 1H), 1.76-1.65 (m, 1H), 1.39-1.10 (m, 4H), 0.83 (t,  $J = 6.9$  Hz, 3H);  $^{13}\text{C}$  NMR (100 MHz,  $\text{CDCl}_3$ )  $\delta$  176.9, 168.5, 134.2, 131.9, 123.5, 47.9, 36.9, 32.3, 28.6, 22.4, 14.1; HRMS (ESI) Calcd for  $\text{C}_{15}\text{H}_{17}\text{NNaO}_4$  (M+Na): 298.1050; Found: 298.1043.

**Table 2, 2c**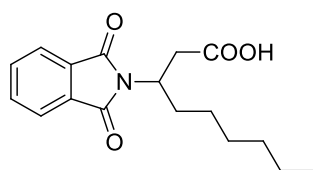

Yellow oil; IR (film) 3222, 1770, 1709, 722  $\text{cm}^{-1}$ ;  $^1\text{H}$  NMR (400 MHz,  $\text{CDCl}_3$ )  $\delta$  7.84-7.79 (m, 2H), 7.73-7.68 (m, 2H), 4.67-4.58 (m, 1H), 3.21 (dd,  $J = 16.5$ , 9.2 Hz, 1H),

2.81 (dd,  $J = 16.5, 5.5$  Hz, 1H), 2.10-1.99 (m, 1H), 1.76-1.65 (m, 1H), 1.34-1.13 (m, 8H), 0.83 (t,  $J = 6.7$  Hz, 3H);  $^{13}\text{C}$  NMR (100 MHz,  $\text{CDCl}_3$ )  $\delta$  177.0, 168.5, 134.2, 131.9, 123.5, 47.9, 36.9, 32.6, 31.8, 28.9, 26.4, 22.7, 14.2; HRMS (ESI) Calcd for  $\text{C}_{15}\text{H}_{17}\text{NNaO}_4$  ( $\text{M}+\text{Na}$ ): 326.1363; Found: 326.1358.

**Table 2, 2d**

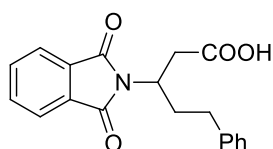

Yellow oil; IR (film) 3225, 1773, 1710, 720  $\text{cm}^{-1}$ ;  $^1\text{H}$  NMR (400 MHz,  $\text{CDCl}_3$ )  $\delta$  7.80-7.74 (m, 2H), 7.71-7.66 (m, 2H), 7.18-7.01 (m, 5H), 4.75-4.66 (m, 1H), 3.20 (dd,  $J = 16.6, 9.0$  Hz, 1H), 2.85 (dd,  $J = 16.6, 5.7$  Hz, 1H), 2.71-2.61 (m, 3H), 2.59-2.43 (m, 2H), 2.08-1.98 (m, 1H);  $^{13}\text{C}$  NMR (100 MHz,  $\text{CDCl}_3$ )  $\delta$  176.7, 168.5, 140.7, 134.1, 131.8, 128.5, 128.4, 126.1, 123.5, 47.8, 37.0, 33.7, 33.0; HRMS (ESI) Calcd for  $\text{C}_{19}\text{H}_{16}\text{NNaO}_4$  ( $\text{M}+\text{Na}$ ): 346.1050; Found: 346.1048.

A. Temperini, R. Terlizzi, L. Testaferri, M. Tiecco, *Chem. Eur. J.*, 2009, **15**, 7883.

**Table 2, 2e**

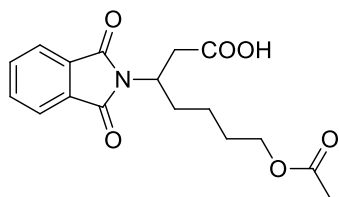

Yellow oil; IR (film) 3219, 1770, 1733, 1706, 719  $\text{cm}^{-1}$ ;  $^1\text{H}$  NMR (400 MHz,  $\text{CDCl}_3$ )  $\delta$  7.83-7.78 (m, 2H), 7.73-7.67 (m, 2H), 4.66-4.57 (m, 1H), 4.03-3.91 (m, 2H), 3.15 (dd,  $J = 16.5, 8.9$  Hz, 1H), 2.80 (dd,  $J = 16.5, 5.6$  Hz, 1H), 2.14-2.02 (m, 1H), 1.96 (s, 3H), 1.77-1.51 (m, 3H), 1.39-1.19 (m, 2H);  $^{13}\text{C}$  NMR (100 MHz,  $\text{CDCl}_3$ )  $\delta$  176.3, 171.5, 168.5, 134.3, 131.8, 123.5, 64.3, 47.7, 37.0, 32.0, 28.1, 22.9, 21.1; HRMS (ESI) Calcd for  $\text{C}_{17}\text{H}_{19}\text{NNaO}_6$  ( $\text{M}+\text{Na}$ ): 356.1105; Found: 356.1106.

**Table 2, 2f**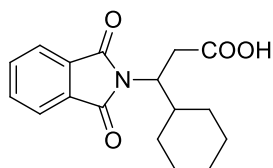

Yellow oil; IR (film) 3224, 1770, 1709, 719  $\text{cm}^{-1}$ ;  $^1\text{H}$  NMR (400 MHz,  $\text{CDCl}_3$ )  $\delta$  7.82-7.77 (m, 2H), 7.73-7.67 (m, 2H), 4.36-4.27 (m, 1H), 3.30-3.20 (m, 1H), 2.84 (dt,  $J = 16.5, 4.2$  Hz, 1H), 2.06-1.43 (m, 6H), 1.33-0.80 (m, 5H);  $^{13}\text{C}$  NMR (100 MHz,  $\text{CDCl}_3$ )  $\delta$  177.6, 168.6, 134.1, 131.7, 123.5, 52.9, 39.6, 34.2, 30.5, 29.8, 26.1, 25.9, 25.8; HRMS (ESI) Calcd for  $\text{C}_{17}\text{H}_{19}\text{NNaO}_4$  ( $\text{M}+\text{Na}$ ): 324.1206; Found: 324.1207.

A. Temperini, R. Terlizzi, L. Testaferri, M. Tiecco, *Chem. Eur. J.*, 2009, **15**, 7883.

**Table 2, 2g**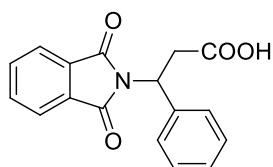

Yellow solid; mp. 177-178  $^{\circ}\text{C}$ ; IR (film) 3219, 1770, 1711, 719  $\text{cm}^{-1}$ ;  $^1\text{H}$  NMR (400 MHz,  $\text{CDCl}_3$ )  $\delta$  7.82-7.77 (m, 2H), 7.71-7.66 (m, 2H), 7.54-7.49 (m, 2H), 7.35-7.25 (m, 3H), 5.79 (dd,  $J = 9.9, 5.8$  Hz, 1H), 3.85 (dd,  $J = 17.1, 9.9$  Hz, 1H), 3.28 (dd,  $J = 17.1, 5.8$  Hz, 1H);  $^{13}\text{C}$  NMR (100 MHz,  $\text{CDCl}_3$ )  $\delta$  176.5, 168.2, 138.5, 134.2, 131.9, 129.0, 128.5, 127.9, 123.6, 50.7, 35.9; HRMS (ESI) Calcd for  $\text{C}_{17}\text{H}_{13}\text{NNaO}_4$  ( $\text{M}+\text{Na}$ ): 318.0737; Found: 318.0739.

**Table 2, 2h**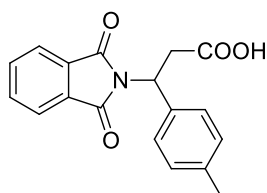

Yellow solid; mp. 175-176 °C; IR (film) 3094, 1770, 1704, 717  $\text{cm}^{-1}$ ;  $^1\text{H}$  NMR (400 MHz,  $\text{CDCl}_3$ )  $\delta$  7.81-7.76 (m, 2H), 7.70-7.65 (m, 2H), 7.40 (d,  $J = 8.1$  Hz, 2H), 7.13 (d,  $J = 8.0$  Hz, 2H), 5.76 (dd,  $J = 9.8, 5.9$  Hz, 1H), 3.81 (dd,  $J = 17.0, 9.8$  Hz, 1H), 3.27 (dd,  $J = 17.0, 5.9$  Hz, 1H), 2.30 (s, 3H);  $^{13}\text{C}$  NMR (100 MHz,  $\text{CDCl}_3$ )  $\delta$  176.7, 168.2, 138.2, 135.5, 134.2, 131.9, 129.6, 127.8, 123.5, 50.4, 35.9, 21.2; HRMS (ESI) Calcd for  $\text{C}_{18}\text{H}_{15}\text{NNaO}_4$  (M+Na): 332.0893; Found: 332.0894.

**Table 2, 2i**

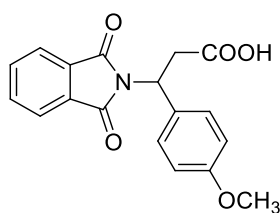

Yellow oil; IR (film) 3213, 1767, 1709, 716  $\text{cm}^{-1}$ ;  $^1\text{H}$  NMR (400 MHz,  $\text{CDCl}_3$ )  $\delta$  7.81-7.76 (m, 2H), 7.70-7.66 (m, 2H), 7.46 (d,  $J = 8.7$  Hz, 2H), 6.84 (d,  $J = 8.7$  Hz, 2H), 5.75 (dd,  $J = 9.8, 6.0$  Hz, 1H), 3.80 (dd,  $J = 17.0, 9.8$  Hz, 1H), 3.76 (s, 3H), 3.28 (dd,  $J = 17.0, 6.0$  Hz, 1H);  $^{13}\text{C}$  NMR (100 MHz,  $\text{CDCl}_3$ )  $\delta$  176.3, 168.3, 159.6, 134.2, 132.0, 130.7, 129.3, 123.5, 114.2, 55.4, 50.2, 36.0; HRMS (ESI) Calcd for  $\text{C}_{18}\text{H}_{15}\text{NNaO}_5$  (M+Na): 348.0842; Found: 348.0846.

**Table 2, 2j**

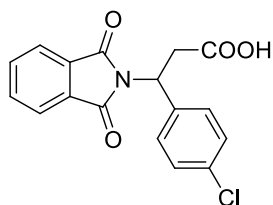

Yellow solid; mp. 149-151 °C; IR (film) 3222, 1771, 1712, 717  $\text{cm}^{-1}$ ;  $^1\text{H}$  NMR (400 MHz,  $\text{CDCl}_3$ )  $\delta$  7.83-7.77 (m, 2H), 7.72-7.67 (m, 2H), 7.46 (d,  $J = 8.5$  Hz, 2H), 7.29 (d,  $J = 8.5$  Hz, 2H), 5.76 (dd,  $J = 9.4, 6.2$  Hz, 1H), 3.76 (dd,  $J = 17.1, 9.4$  Hz, 1H), 3.30 (dd,  $J = 17.1, 6.2$  Hz, 1H);  $^{13}\text{C}$  NMR (100 MHz,  $\text{CDCl}_3$ )  $\delta$  176.3, 168.1, 136.9, 134.4, 131.8, 129.5, 129.1,

123.7, 50.0, 35.8; HRMS (ESI) Calcd for  $C_{17}H_{12}ClNNaO_4$  ( $M+Na$ ): 352.0347; Found: 352.0350.

**Table 2, 2k**

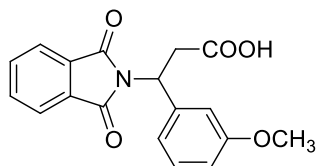

Yellow solid; mp. 118-119 °C; IR (film) 3219, 1770, 1711, 721  $cm^{-1}$ ;  $^1H$  NMR (400 MHz,  $CDCl_3$ )  $\delta$  7.82-7.77 (m, 2H), 7.71-7.66 (m, 2H), 7.24 (t,  $J = 8.1$  Hz, 1H), 7.12-7.05 (m, 2H), 6.81 (dd,  $J = 8.2, 2.4$  Hz, 1H), 5.76 (dd,  $J = 10.0, 5.8$  Hz, 1H), 3.84 (dd,  $J = 17.1, 10.0$  Hz, 1H), 3.78 (s, 3H), 3.27 (dd,  $J = 17.1, 5.8$  Hz, 1H);  $^{13}C$  NMR (100 MHz,  $CDCl_3$ )  $\delta$  176.3, 168.2, 160.0, 140.0, 134.2, 131.9, 130.0, 123.6, 120.2, 114.0, 113.7, 55.4, 50.8, 35.9; HRMS (ESI) Calcd for  $C_{18}H_{15}NNaO_5$  ( $M+Na$ ): 348.0842; Found: 348.0846.

**Table 2, 2l**

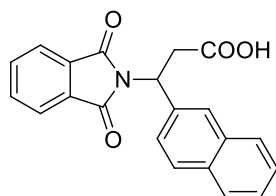

Yellow solid; mp. 173-175 °C; IR (film) 3463, 1770, 1705  $cm^{-1}$ ;  $^1H$  NMR (400 MHz,  $CDCl_3$ )  $\delta$  7.97 (s, 1H), 7.86-7.75 (m, 5H), 7.71-7.61 (m, 3H), 7.50-7.42 (m, 2H), 5.97 (dd,  $J = 9.8, 5.9$  Hz, 1H), 3.94 (dd,  $J = 17.0, 9.8$  Hz, 1H), 3.42 (dd,  $J = 17.0, 5.9$  Hz, 1H);  $^{13}C$  NMR (100 MHz,  $CDCl_3$ )  $\delta$  175.9, 168.3, 135.8, 134.3, 133.3, 133.2, 131.9, 128.9, 128.4, 127.8, 127.1, 126.6, 126.57, 125.7, 123.6, 50.9, 35.8; HRMS (ESI) Calcd for  $C_{21}H_{16}NO_4$  ( $M+H$ ): 346.1074; Found: 346.1076.

**Table 1, 3b**

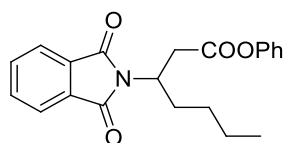

Yellow solid; mp. 100-101 °C; IR (film) 1756, 1708, 1638, 1370  $\text{cm}^{-1}$ ;  $^1\text{H}$  NMR (400 MHz,  $\text{CDCl}_3$ )  $\delta$  7.86-7.80 (m, 2H), 7.73-7.67 (m, 2H), 7.34-7.28 (m, 2H), 7.20-7.14 (m, 1H), 7.01-6.96 (m, 2H), 4.82-4.73 (m, 1H), 3.44 (dd,  $J = 15.9, 9.8$  Hz, 1H), 3.02 (dd,  $J = 15.9, 5.0$  Hz, 1H), 2.23-2.10 (m, 1H), 1.88-1.77 (m, 1H), 1.44-1.19 (m, 4H), 0.87 (t,  $J = 6.9$  Hz, 3H);  $^{13}\text{C}$  NMR (100 MHz,  $\text{CDCl}_3$ )  $\delta$  169.7, 168.6, 150.6, 134.2, 132.0, 129.6, 126.1, 123.5, 121.6, 48.3, 37.4, 32.4, 28.7, 22.4, 14.1; HRMS (ESI) Calcd for  $\text{C}_{21}\text{H}_{22}\text{NO}_4$  (M+H): 352.1543; Found: 352.1545.

### Procedure for the hydrolysis in Scheme 3

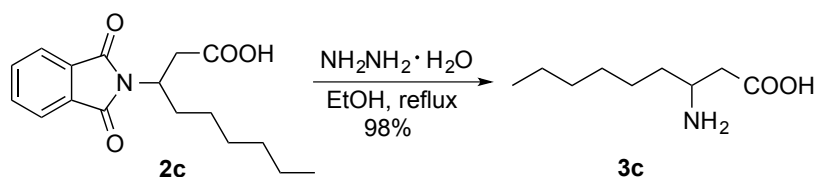

To a solution of compound **2c** (0.1517 g, 0.50 mmol) in EtOH (14 mL) was added hydrazine hydrate (0.41 g, 8.3 mmol) dropwise. The reaction mixture was stirred at reflux for 4 h, cooled to room temperature, filtered, and washed with ether (3x). The filtrate was concentrated to give amino acid **3c** (0.085 g, 98%) as a white solid; mp. 212-213 °C; IR (film) 3405, 2955, 2926, 2859, 1573, 1396  $\text{cm}^{-1}$ ;  $^1\text{H}$  NMR (400 MHz,  $\text{D}_2\text{O}$ )  $\delta$  3.54-3.45 (m, 1H), 2.57 (dd,  $J = 16.6, 4.8$  Hz, 1H), 2.43 (dd,  $J = 16.6, 8.3$  Hz, 1H), 1.66 (m, 2H), 1.45-1.24 (m, 8H), 0.88 (t,  $J = 5.8$  Hz, 3H);  $^{13}\text{C}$  NMR (100 MHz,  $\text{CDCl}_3$ )  $\delta$  178.2, 49.4, 38.5, 32.1, 30.7, 28.0, 24.3, 21.8, 13.3; HRMS (ESI) Calcd for  $\text{C}_9\text{H}_{20}\text{NO}_2$  (M+H): 174.1489; Found: 174.1484.

B. Weiner, A. Baeza, T. Jerphagnon, B. L. Feringa, *J. Am. Chem. Soc.*, 2009, **131**, 9473.



# The X-ray structure of compound **2a**

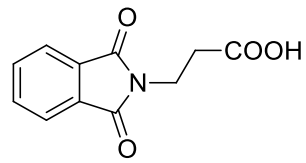

**2a**

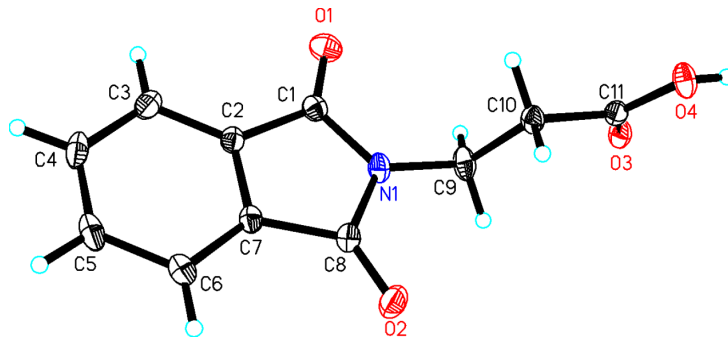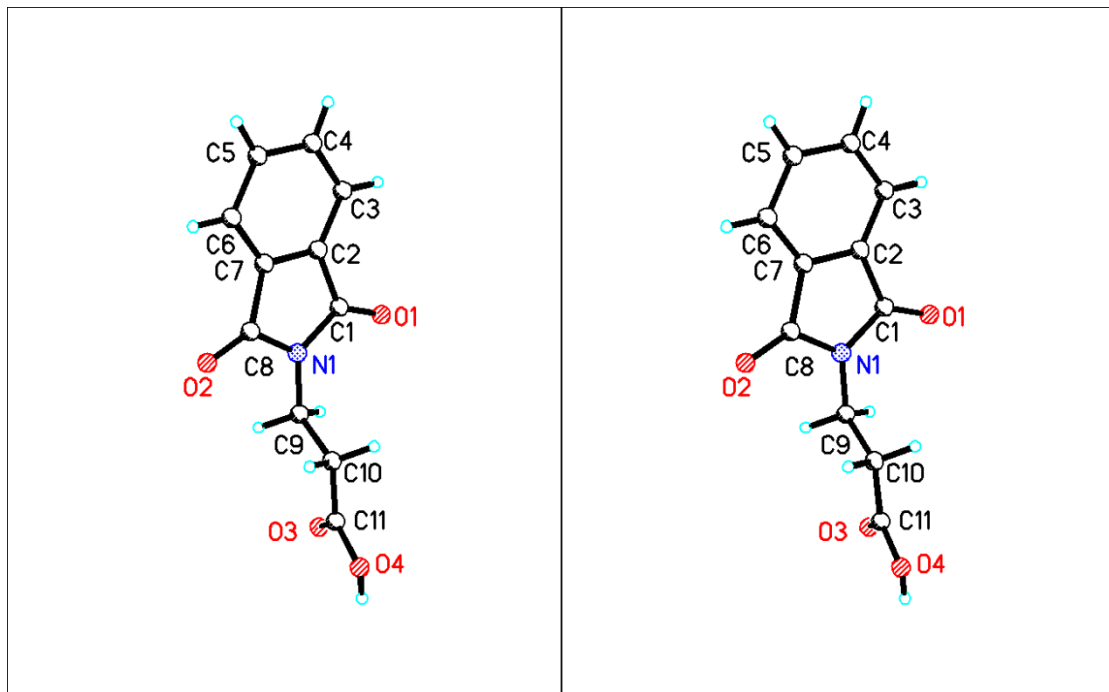

Table 1. Crystal data and structure refinement for **2a**.

|                                   |                                                 |                  |
|-----------------------------------|-------------------------------------------------|------------------|
| Identification code               | <b>2a</b>                                       |                  |
| Empirical formula                 | C <sub>11</sub> H <sub>9</sub> N O <sub>4</sub> |                  |
| Formula weight                    | 219.19                                          |                  |
| Temperature                       | 173.1500 K                                      |                  |
| Wavelength                        | 0.71073 Å                                       |                  |
| Crystal system                    | Triclinic                                       |                  |
| Space group                       | P -1                                            |                  |
| Unit cell dimensions              | a = 8.629(2) Å                                  | a = 80.505(11)°. |
|                                   | b = 10.440(3) Å                                 | b = 76.238(11)°. |
|                                   | c = 12.379(4) Å                                 | g = 65.983(9)°.  |
| Volume                            | 986.5(5) Å <sup>3</sup>                         |                  |
| Z                                 | 4                                               |                  |
| Density (calculated)              | 1.476 Mg/m <sup>3</sup>                         |                  |
| Absorption coefficient            | 0.114 mm <sup>-1</sup>                          |                  |
| F(000)                            | 456                                             |                  |
| Crystal size                      | 0.43 x 0.32 x 0.24 mm <sup>3</sup>              |                  |
| Theta range for data collection   | 2.630 to 27.497°.                               |                  |
| Index ranges                      | -10 ≤ h ≤ 11, -13 ≤ k ≤ 12, -15 ≤ l ≤ 16        |                  |
| Reflections collected             | 8415                                            |                  |
| Independent reflections           | 4432 [R(int) = 0.0257]                          |                  |
| Completeness to theta = 26.000°   | 98.0 %                                          |                  |
| Absorption correction             | Semi-empirical from equivalents                 |                  |
| Max. and min. transmission        | 1.0000 and 0.8664                               |                  |
| Refinement method                 | Full-matrix least-squares on F <sup>2</sup>     |                  |
| Data / restraints / parameters    | 4432 / 0 / 291                                  |                  |
| Goodness-of-fit on F <sup>2</sup> | 1.127                                           |                  |
| Final R indices [I > 2σ(I)]       | R1 = 0.0492, wR2 = 0.1175                       |                  |
| R indices (all data)              | R1 = 0.0553, wR2 = 0.1215                       |                  |
| Extinction coefficient            | n/a                                             |                  |
| Largest diff. peak and hole       | 0.248 and -0.252 e.Å <sup>-3</sup>              |                  |

Table 2. Atomic coordinates ( $\times 10^4$ ) and equivalent isotropic displacement parameters ( $\text{\AA}^2 \times 10^3$ ) for **2a**. U(eq) is defined as one third of the trace of the orthogonalized  $U^{ij}$  tensor.

|      | x        | y       | z        | U(eq) |
|------|----------|---------|----------|-------|
| O1   | 2179(2)  | 4723(1) | 376(1)   | 39(1) |
| O2   | 2132(2)  | 9137(1) | -688(1)  | 39(1) |
| O3   | -1203(2) | 7294(1) | -2604(1) | 29(1) |
| O4   | -3599(2) | 8611(1) | -1488(1) | 33(1) |
| N1   | 1908(2)  | 6969(1) | -350(1)  | 27(1) |
| C1   | 2480(2)  | 5757(2) | 361(1)   | 26(1) |
| C2   | 3498(2)  | 6036(2) | 1046(1)  | 25(1) |
| C3   | 4341(2)  | 5203(2) | 1882(1)  | 32(1) |
| C4   | 5164(2)  | 5770(2) | 2390(1)  | 37(1) |
| C5   | 5144(2)  | 7109(2) | 2066(1)  | 36(1) |
| C6   | 4310(2)  | 7944(2) | 1211(1)  | 31(1) |
| C7   | 3486(2)  | 7375(2) | 715(1)   | 24(1) |
| C8   | 2458(2)  | 7994(2) | -185(1)  | 27(1) |
| C9   | 962(2)   | 7099(2) | -1219(1) | 33(1) |
| C10  | -975(2)  | 7823(2) | -850(1)  | 27(1) |
| C11  | -1916(2) | 7873(2) | -1742(1) | 25(1) |
| O1A  | 7350(2)  | 4462(1) | 4622(1)  | 39(1) |
| O2A  | 8693(2)  | -23(1)  | 6221(1)  | 40(1) |
| O3A  | 5061(2)  | 1644(2) | 3108(1)  | 43(1) |
| O4A  | 2678(2)  | 2080(2) | 4405(1)  | 49(1) |
| N1A  | 7796(2)  | 2160(1) | 5259(1)  | 27(1) |
| C1A  | 7964(2)  | 3436(2) | 5234(1)  | 26(1) |
| C2A  | 9022(2)  | 3237(2) | 6083(1)  | 24(1) |
| C3A  | 9587(2)  | 4153(2) | 6400(1)  | 30(1) |
| C4A  | 10595(2) | 3645(2) | 7220(1)  | 33(1) |
| C5A  | 11013(2) | 2277(2) | 7694(1)  | 33(1) |
| C6A  | 10435(2) | 1360(2) | 7375(1)  | 29(1) |
| C7A  | 9435(2)  | 1871(2) | 6563(1)  | 23(1) |
| C8A  | 8646(2)  | 1164(2) | 6040(1)  | 26(1) |
| C9A  | 7000(2)  | 1851(2) | 4476(1)  | 32(1) |
| C10A | 5125(2)  | 2077(2) | 4927(1)  | 29(1) |
| C11A | 4302(2)  | 1902(2) | 4054(1)  | 28(1) |

Table 3. Bond lengths [ $\text{\AA}$ ] and angles [ $^\circ$ ] for **2a**.

---

|          |            |
|----------|------------|
| O1-C1    | 1.205(2)   |
| O2-C8    | 1.206(2)   |
| O3-C11   | 1.2161(19) |
| O4-H4    | 0.8200     |
| O4-C11   | 1.3244(19) |
| N1-C1    | 1.396(2)   |
| N1-C8    | 1.394(2)   |
| N1-C9    | 1.4564(19) |
| C1-C2    | 1.490(2)   |
| C2-C3    | 1.379(2)   |
| C2-C7    | 1.387(2)   |
| C3-H3    | 0.9300     |
| C3-C4    | 1.388(3)   |
| C4-H4A   | 0.9300     |
| C4-C5    | 1.384(3)   |
| C5-H5    | 0.9300     |
| C5-C6    | 1.395(2)   |
| C6-H6    | 0.9300     |
| C6-C7    | 1.381(2)   |
| C7-C8    | 1.487(2)   |
| C9-H9A   | 0.9700     |
| C9-H9B   | 0.9700     |
| C9-C10   | 1.515(2)   |
| C10-H10A | 0.9700     |
| C10-H10B | 0.9700     |
| C10-C11  | 1.502(2)   |
| O1A-C1A  | 1.2101(19) |
| O2A-C8A  | 1.208(2)   |
| O3A-C11A | 1.211(2)   |
| O4A-H4AA | 0.8200     |
| O4A-C11A | 1.308(2)   |
| N1A-C1A  | 1.392(2)   |
| N1A-C8A  | 1.393(2)   |
| N1A-C9A  | 1.4538(19) |
| C1A-C2A  | 1.487(2)   |
| C2A-C3A  | 1.378(2)   |

|           |          |
|-----------|----------|
| C2A-C7A   | 1.386(2) |
| C3A-H3A   | 0.9300   |
| C3A-C4A   | 1.391(2) |
| C4A-H4AB  | 0.9300   |
| C4A-C5A   | 1.385(3) |
| C5A-H5A   | 0.9300   |
| C5A-C6A   | 1.389(2) |
| C6A-H6A   | 0.9300   |
| C6A-C7A   | 1.379(2) |
| C7A-C8A   | 1.485(2) |
| C9A-H9AA  | 0.9700   |
| C9A-H9AB  | 0.9700   |
| C9A-C10A  | 1.512(2) |
| C10A-H10C | 0.9700   |
| C10A-H10D | 0.9700   |
| C10A-C11A | 1.498(2) |

|           |            |
|-----------|------------|
| C11-O4-H4 | 109.5      |
| C1-N1-C9  | 123.58(14) |
| C8-N1-C1  | 112.17(12) |
| C8-N1-C9  | 124.09(14) |
| O1-C1-N1  | 124.74(15) |
| O1-C1-C2  | 129.49(15) |
| N1-C1-C2  | 105.77(13) |
| C3-C2-C1  | 130.34(15) |
| C3-C2-C7  | 121.70(15) |
| C7-C2-C1  | 107.96(13) |
| C2-C3-H3  | 121.5      |
| C2-C3-C4  | 117.08(16) |
| C4-C3-H3  | 121.5      |
| C3-C4-H4A | 119.4      |
| C5-C4-C3  | 121.29(16) |
| C5-C4-H4A | 119.4      |
| C4-C5-H5  | 119.2      |
| C4-C5-C6  | 121.63(16) |
| C6-C5-H5  | 119.2      |
| C5-C6-H6  | 121.7      |
| C7-C6-C5  | 116.66(16) |

|               |            |
|---------------|------------|
| C7-C6-H6      | 121.7      |
| C2-C7-C8      | 108.38(13) |
| C6-C7-C2      | 121.65(15) |
| C6-C7-C8      | 129.96(15) |
| O2-C8-N1      | 125.22(15) |
| O2-C8-C7      | 129.05(15) |
| N1-C8-C7      | 105.73(13) |
| N1-C9-H9A     | 109.1      |
| N1-C9-H9B     | 109.1      |
| N1-C9-C10     | 112.61(13) |
| H9A-C9-H9B    | 107.8      |
| C10-C9-H9A    | 109.1      |
| C10-C9-H9B    | 109.1      |
| C9-C10-H10A   | 109.4      |
| C9-C10-H10B   | 109.4      |
| H10A-C10-H10B | 108.0      |
| C11-C10-C9    | 111.26(13) |
| C11-C10-H10A  | 109.4      |
| C11-C10-H10B  | 109.4      |
| O3-C11-O4     | 123.86(14) |
| O3-C11-C10    | 123.37(14) |
| O4-C11-C10    | 112.77(13) |
| C11A-O4A-H4AA | 109.5      |
| C1A-N1A-C8A   | 111.99(12) |
| C1A-N1A-C9A   | 123.99(13) |
| C8A-N1A-C9A   | 123.66(13) |
| O1A-C1A-N1A   | 124.52(15) |
| O1A-C1A-C2A   | 129.50(15) |
| N1A-C1A-C2A   | 105.98(13) |
| C3A-C2A-C1A   | 130.58(14) |
| C3A-C2A-C7A   | 121.49(14) |
| C7A-C2A-C1A   | 107.93(13) |
| C2A-C3A-H3A   | 121.4      |
| C2A-C3A-C4A   | 117.11(15) |
| C4A-C3A-H3A   | 121.4      |
| C3A-C4A-H4AB  | 119.4      |
| C5A-C4A-C3A   | 121.29(15) |
| C5A-C4A-H4AB  | 119.4      |

|                |            |
|----------------|------------|
| C4A-C5A-H5A    | 119.3      |
| C4A-C5A-C6A    | 121.38(15) |
| C6A-C5A-H5A    | 119.3      |
| C5A-C6A-H6A    | 121.5      |
| C7A-C6A-C5A    | 117.01(15) |
| C7A-C6A-H6A    | 121.5      |
| C2A-C7A-C8A    | 108.24(13) |
| C6A-C7A-C2A    | 121.72(14) |
| C6A-C7A-C8A    | 130.04(15) |
| O2A-C8A-N1A    | 124.85(14) |
| O2A-C8A-C7A    | 129.29(15) |
| N1A-C8A-C7A    | 105.86(13) |
| N1A-C9A-H9AA   | 109.0      |
| N1A-C9A-H9AB   | 109.0      |
| N1A-C9A-C10A   | 112.87(13) |
| H9AA-C9A-H9AB  | 107.8      |
| C10A-C9A-H9AA  | 109.0      |
| C10A-C9A-H9AB  | 109.0      |
| C9A-C10A-H10C  | 109.4      |
| C9A-C10A-H10D  | 109.4      |
| H10C-C10A-H10D | 108.0      |
| C11A-C10A-C9A  | 111.15(13) |
| C11A-C10A-H10C | 109.4      |
| C11A-C10A-H10D | 109.4      |
| O3A-C11A-O4A   | 123.37(14) |
| O3A-C11A-C10A  | 123.10(14) |
| O4A-C11A-C10A  | 113.51(14) |

---

Symmetry transformations used to generate equivalent atoms:

Table 4. Anisotropic displacement parameters ( $\text{\AA}^2 \times 10^3$ ) for **2a**. The anisotropic displacement factor exponent takes the form:  $-2p^2 [ h^2 a^{*2} U^{11} + \dots + 2 h k a^* b^* U^{12} ]$

|      | U <sup>11</sup> | U <sup>22</sup> | U <sup>33</sup> | U <sup>23</sup> | U <sup>13</sup> | U <sup>12</sup> |
|------|-----------------|-----------------|-----------------|-----------------|-----------------|-----------------|
| O1   | 43(1)           | 35(1)           | 45(1)           | -6(1)           | -6(1)           | -21(1)          |
| O2   | 45(1)           | 30(1)           | 40(1)           | 6(1)            | -19(1)          | -11(1)          |
| O3   | 33(1)           | 30(1)           | 27(1)           | -3(1)           | -13(1)          | -10(1)          |
| O4   | 29(1)           | 39(1)           | 35(1)           | -10(1)          | -14(1)          | -8(1)           |
| N1   | 28(1)           | 29(1)           | 27(1)           | -5(1)           | -12(1)          | -9(1)           |
| C1   | 24(1)           | 28(1)           | 26(1)           | -5(1)           | -3(1)           | -9(1)           |
| C2   | 21(1)           | 29(1)           | 22(1)           | -3(1)           | -4(1)           | -7(1)           |
| C3   | 27(1)           | 35(1)           | 26(1)           | 4(1)            | -4(1)           | -6(1)           |
| C4   | 24(1)           | 54(1)           | 23(1)           | -1(1)           | -9(1)           | -4(1)           |
| C5   | 23(1)           | 58(1)           | 31(1)           | -13(1)          | -6(1)           | -13(1)          |
| C6   | 26(1)           | 37(1)           | 33(1)           | -7(1)           | -6(1)           | -13(1)          |
| C7   | 21(1)           | 28(1)           | 24(1)           | -3(1)           | -6(1)           | -7(1)           |
| C8   | 26(1)           | 26(1)           | 26(1)           | -3(1)           | -8(1)           | -7(1)           |
| C9   | 31(1)           | 43(1)           | 28(1)           | -10(1)          | -13(1)          | -9(1)           |
| C10  | 29(1)           | 28(1)           | 26(1)           | -4(1)           | -12(1)          | -11(1)          |
| C11  | 28(1)           | 21(1)           | 28(1)           | -1(1)           | -10(1)          | -11(1)          |
| O1A  | 39(1)           | 35(1)           | 39(1)           | 9(1)            | -18(1)          | -11(1)          |
| O2A  | 49(1)           | 30(1)           | 49(1)           | 0(1)            | -17(1)          | -20(1)          |
| O3A  | 29(1)           | 70(1)           | 32(1)           | -19(1)          | -9(1)           | -13(1)          |
| O4A  | 35(1)           | 91(1)           | 34(1)           | -21(1)          | -4(1)           | -32(1)          |
| N1A  | 26(1)           | 30(1)           | 27(1)           | -4(1)           | -11(1)          | -9(1)           |
| C1A  | 22(1)           | 28(1)           | 25(1)           | -2(1)           | -6(1)           | -7(1)           |
| C2A  | 20(1)           | 27(1)           | 24(1)           | -3(1)           | -4(1)           | -9(1)           |
| C3A  | 29(1)           | 30(1)           | 34(1)           | -5(1)           | -3(1)           | -14(1)          |
| C4A  | 28(1)           | 45(1)           | 36(1)           | -12(1)          | -4(1)           | -20(1)          |
| C5A  | 27(1)           | 51(1)           | 25(1)           | -5(1)           | -8(1)           | -16(1)          |
| C6A  | 29(1)           | 34(1)           | 26(1)           | 3(1)            | -10(1)          | -12(1)          |
| C7A  | 22(1)           | 27(1)           | 23(1)           | -3(1)           | -4(1)           | -10(1)          |
| C8A  | 26(1)           | 28(1)           | 27(1)           | -3(1)           | -7(1)           | -10(1)          |
| C9A  | 29(1)           | 44(1)           | 28(1)           | -11(1)          | -10(1)          | -13(1)          |
| C10A | 31(1)           | 32(1)           | 26(1)           | -5(1)           | -11(1)          | -12(1)          |
| C11A | 28(1)           | 30(1)           | 28(1)           | -4(1)           | -10(1)          | -10(1)          |



Table 5. Hydrogen coordinates ( $\times 10^4$ ) and isotropic displacement parameters ( $\text{\AA}^2 \times 10^3$ ) for **2a**.

|      | x     | y    | z     | U(eq) |
|------|-------|------|-------|-------|
| H4   | -4065 | 8583 | -1984 | 50    |
| H3   | 4357  | 4302 | 2097  | 39    |
| H4A  | 5740  | 5239 | 2960  | 44    |
| H5   | 5700  | 7461 | 2426  | 44    |
| H6   | 4309  | 8839 | 985   | 37    |
| H9A  | 1225  | 6168 | -1432 | 40    |
| H9B  | 1346  | 7628 | -1870 | 40    |
| H10A | -1357 | 7323 | -178  | 32    |
| H10B | -1250 | 8774 | -677  | 32    |
| H4AA | 2247  | 2109 | 3874  | 74    |
| H3A  | 9306  | 5070 | 6080  | 36    |
| H4AB | 10995 | 4236 | 7455  | 40    |
| H5A  | 11696 | 1966 | 8237  | 40    |
| H6A  | 10709 | 443  | 7695  | 35    |
| H9AA | 7638  | 881  | 4295  | 39    |
| H9AB | 7077  | 2447 | 3793  | 39    |
| H10C | 5051  | 1406 | 5561  | 34    |
| H10D | 4504  | 3015 | 5182  | 34    |

Table 6. Torsion angles [°] for **2a**.

---

|                 |             |
|-----------------|-------------|
| O1-C1-C2-C3     | -1.0(3)     |
| O1-C1-C2-C7     | 179.53(16)  |
| N1-C1-C2-C3     | 179.39(16)  |
| N1-C1-C2-C7     | -0.06(16)   |
| N1-C9-C10-C11   | -177.04(13) |
| C1-N1-C8-O2     | -179.60(15) |
| C1-N1-C8-C7     | 0.20(17)    |
| C1-N1-C9-C10    | 97.04(18)   |
| C1-C2-C3-C4     | -178.71(15) |
| C1-C2-C7-C6     | 179.23(14)  |
| C1-C2-C7-C8     | 0.17(16)    |
| C2-C3-C4-C5     | -0.3(2)     |
| C2-C7-C8-O2     | 179.56(16)  |
| C2-C7-C8-N1     | -0.23(17)   |
| C3-C2-C7-C6     | -0.3(2)     |
| C3-C2-C7-C8     | -179.33(14) |
| C3-C4-C5-C6     | -0.5(3)     |
| C4-C5-C6-C7     | 0.9(2)      |
| C5-C6-C7-C2     | -0.5(2)     |
| C5-C6-C7-C8     | 178.34(15)  |
| C6-C7-C8-O2     | 0.6(3)      |
| C6-C7-C8-N1     | -179.18(16) |
| C7-C2-C3-C4     | 0.7(2)      |
| C8-N1-C1-O1     | -179.70(15) |
| C8-N1-C1-C2     | -0.09(17)   |
| C8-N1-C9-C10    | -87.92(19)  |
| C9-N1-C1-O1     | -4.1(2)     |
| C9-N1-C1-C2     | 175.47(13)  |
| C9-N1-C8-O2     | 4.9(3)      |
| C9-N1-C8-C7     | -175.35(13) |
| C9-C10-C11-O3   | 5.8(2)      |
| C9-C10-C11-O4   | -174.22(13) |
| O1A-C1A-C2A-C3A | -0.1(3)     |
| O1A-C1A-C2A-C7A | -179.38(16) |
| N1A-C1A-C2A-C3A | 179.59(15)  |
| N1A-C1A-C2A-C7A | 0.28(16)    |

|                   |             |
|-------------------|-------------|
| N1A-C9A-C10A-C11A | 173.72(14)  |
| C1A-N1A-C8A-O2A   | 180.00(15)  |
| C1A-N1A-C8A-C7A   | -0.13(17)   |
| C1A-N1A-C9A-C10A  | -96.83(18)  |
| C1A-C2A-C3A-C4A   | -179.01(15) |
| C1A-C2A-C7A-C6A   | 179.10(14)  |
| C1A-C2A-C7A-C8A   | -0.36(16)   |
| C2A-C3A-C4A-C5A   | 0.1(2)      |
| C2A-C7A-C8A-O2A   | -179.82(17) |
| C2A-C7A-C8A-N1A   | 0.31(16)    |
| C3A-C2A-C7A-C6A   | -0.3(2)     |
| C3A-C2A-C7A-C8A   | -179.74(14) |
| C3A-C4A-C5A-C6A   | -0.4(3)     |
| C4A-C5A-C6A-C7A   | 0.4(2)      |
| C5A-C6A-C7A-C2A   | 0.0(2)      |
| C5A-C6A-C7A-C8A   | 179.32(15)  |
| C6A-C7A-C8A-O2A   | 0.8(3)      |
| C6A-C7A-C8A-N1A   | -179.09(15) |
| C7A-C2A-C3A-C4A   | 0.2(2)      |
| C8A-N1A-C1A-O1A   | 179.59(15)  |
| C8A-N1A-C1A-C2A   | -0.09(17)   |
| C8A-N1A-C9A-C10A  | 90.54(19)   |
| C9A-N1A-C1A-O1A   | 6.2(2)      |
| C9A-N1A-C1A-C2A   | -173.48(13) |
| C9A-N1A-C8A-O2A   | -6.6(3)     |
| C9A-N1A-C8A-C7A   | 173.29(13)  |
| C9A-C10A-C11A-O3A | -1.5(2)     |
| C9A-C10A-C11A-O4A | 179.63(16)  |

---

Symmetry transformations used to generate equivalent atoms:

Table 7. Hydrogen bonds for **2a** [ $\text{\AA}$  and  $^\circ$ ].

| D-H...A          | d(D-H) | d(H...A) | d(D...A)   | $\angle(\text{DHA})$ |
|------------------|--------|----------|------------|----------------------|
| O4-H4...O3A#1    | 0.82   | 1.89     | 2.7088(17) | 175.3                |
| O4A-H4AA...O3#1  | 0.82   | 1.89     | 2.6858(18) | 163.8                |
| O4A-H4AA...O2A#2 | 0.82   | 2.64     | 3.1091(19) | 117.7                |

Symmetry transformations used to generate equivalent atoms:

#1  $-x, -y+1, -z$     #2  $-x+1, -y, -z+1$

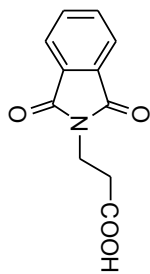

Table 2, 2a

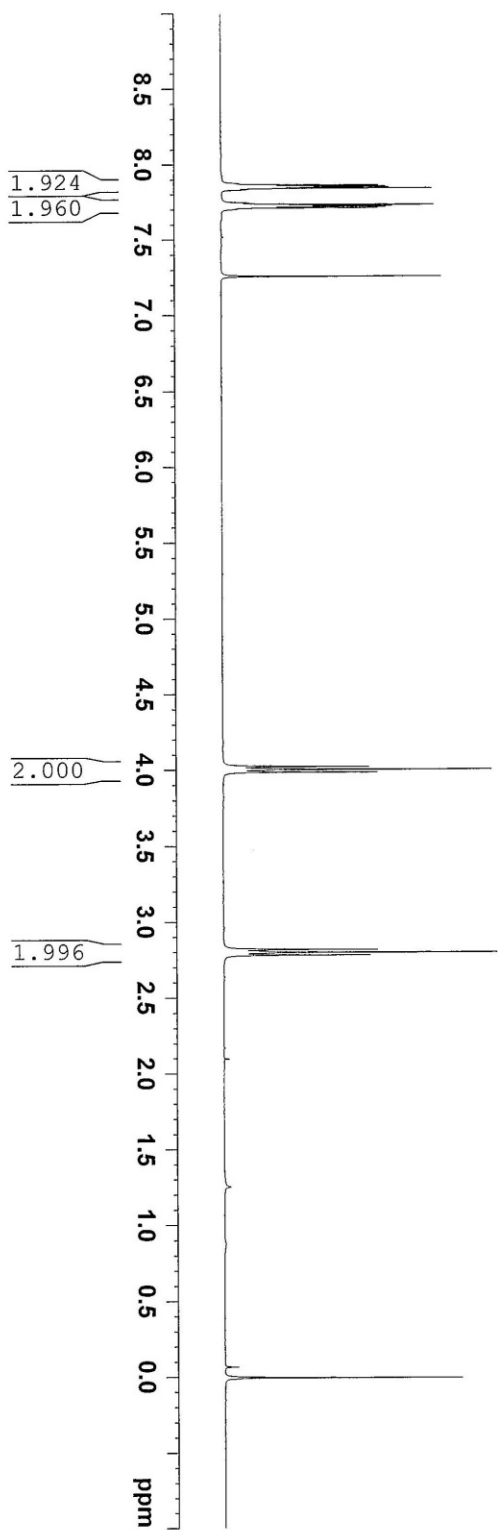

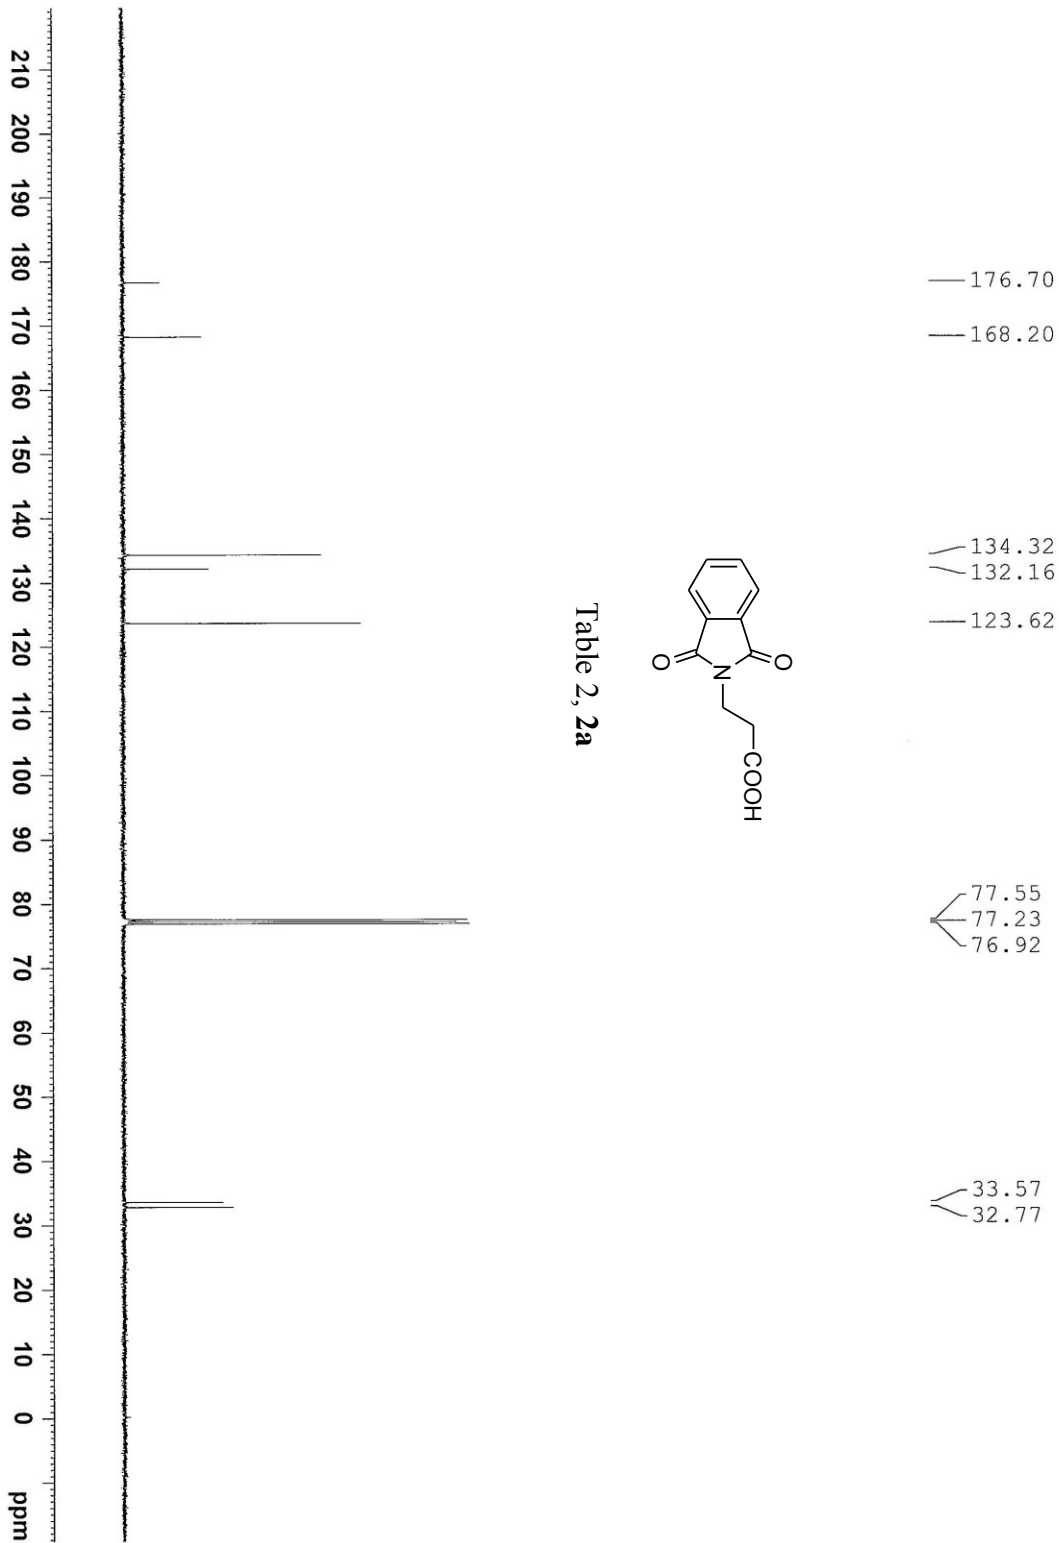

Table 2, 2a

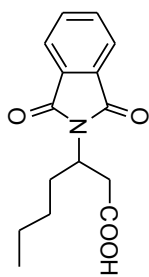

Table 2, 2b

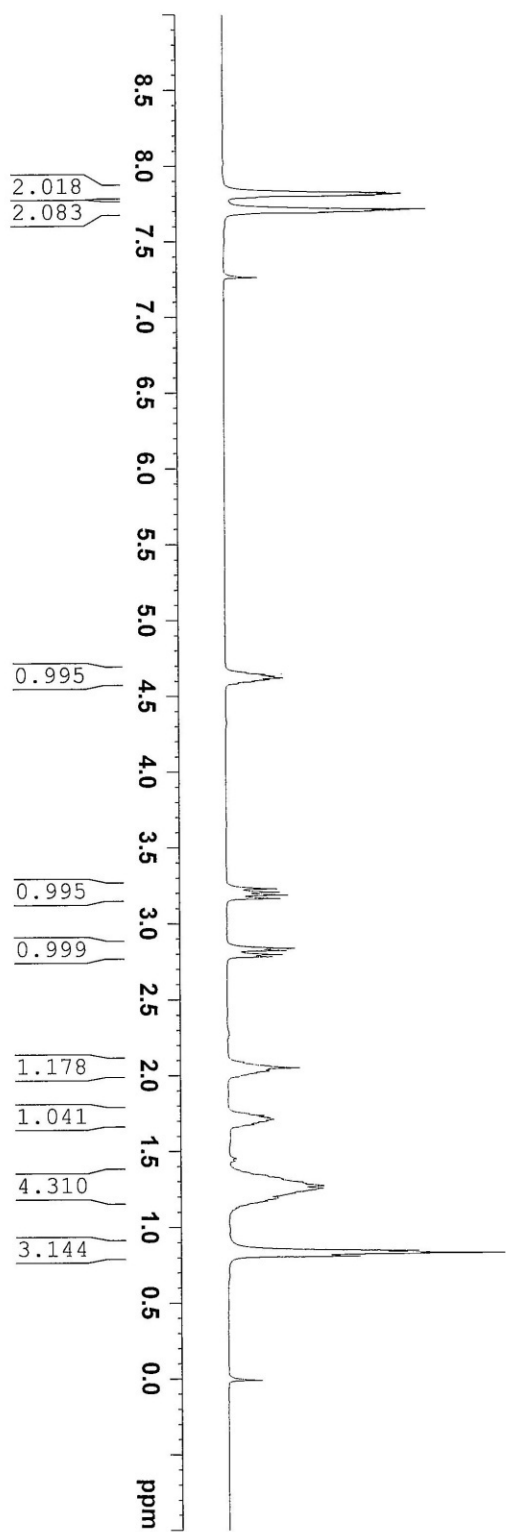

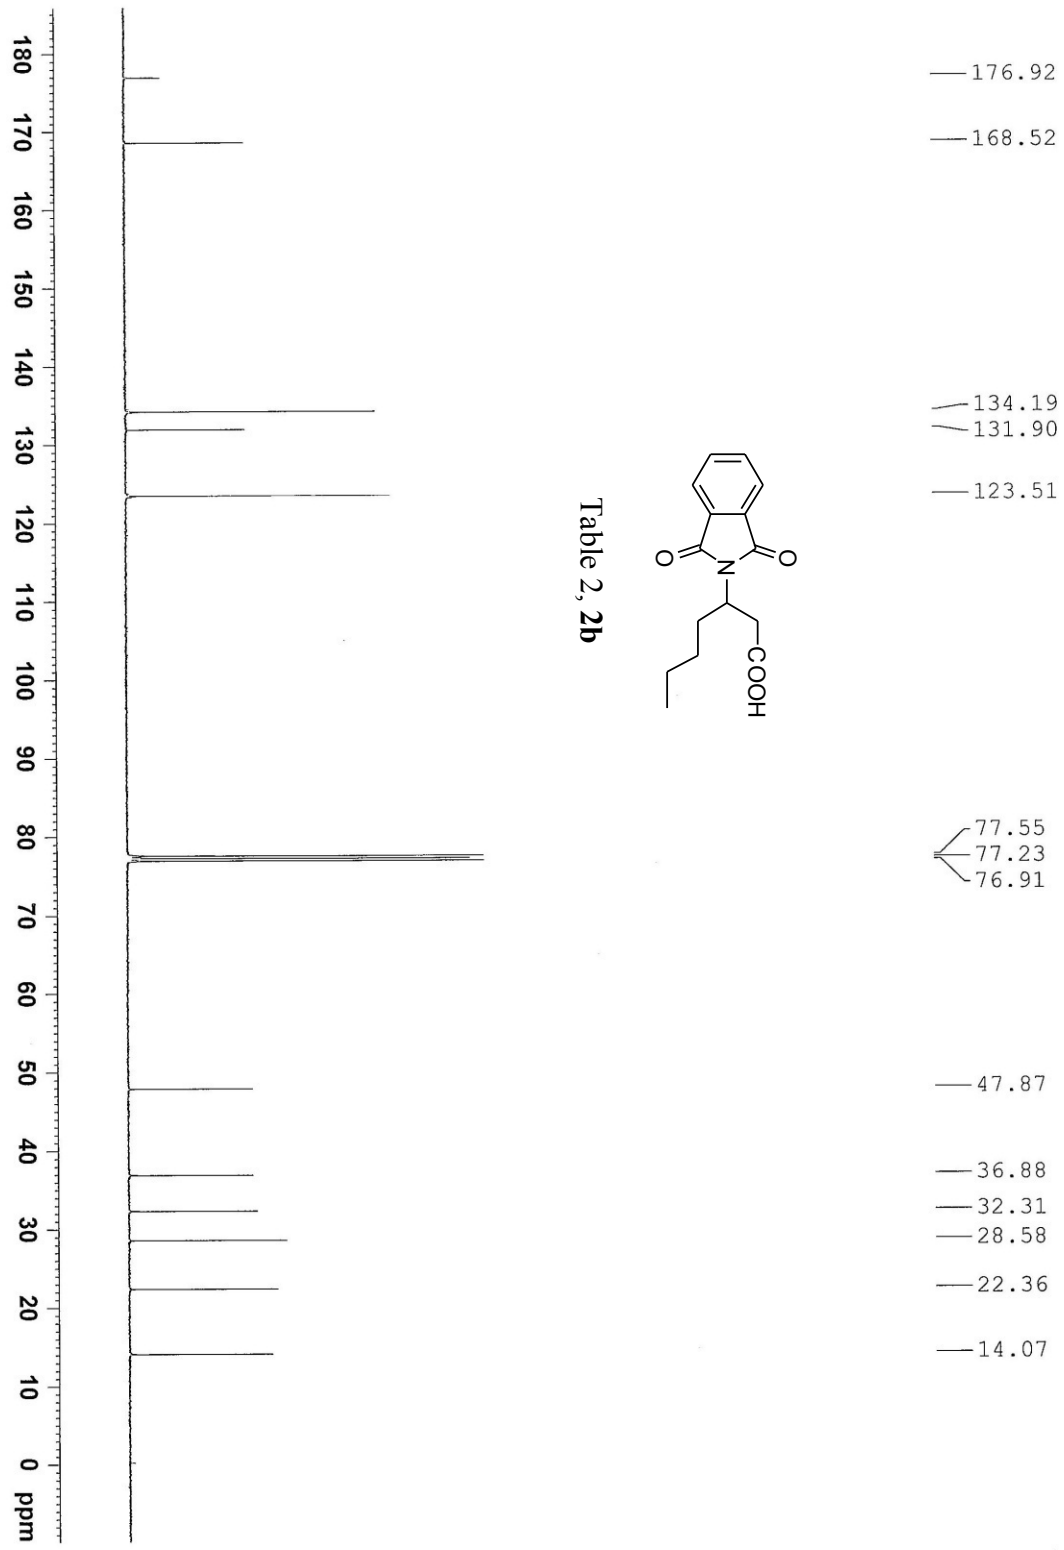



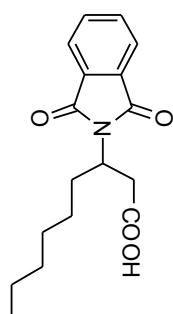

Table 2, 2c

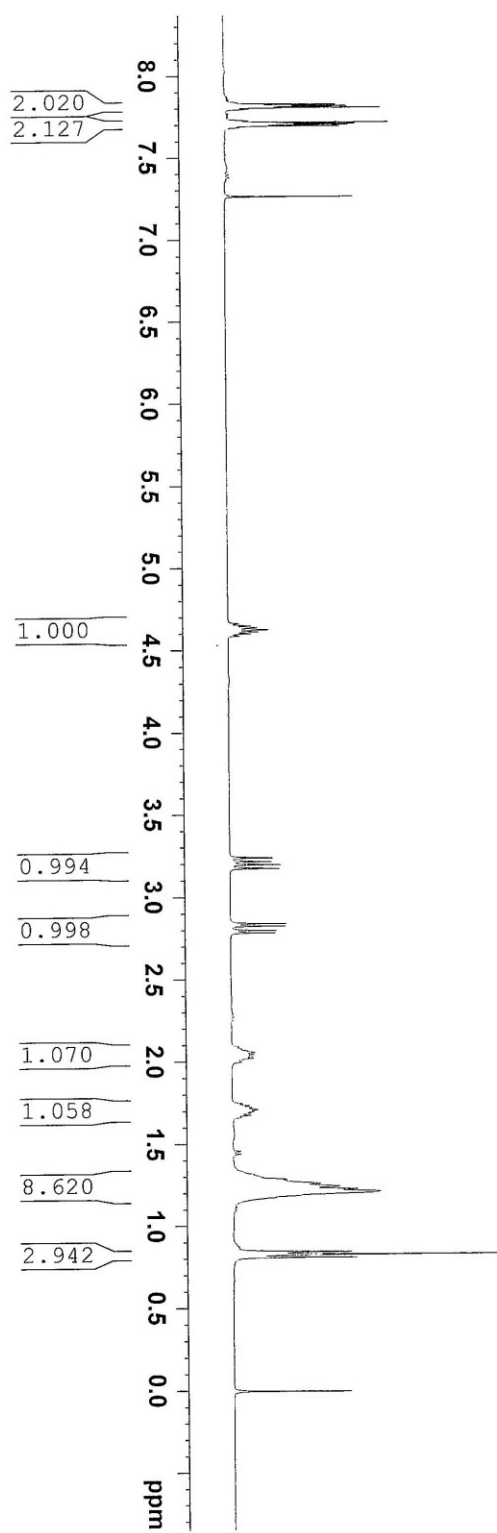

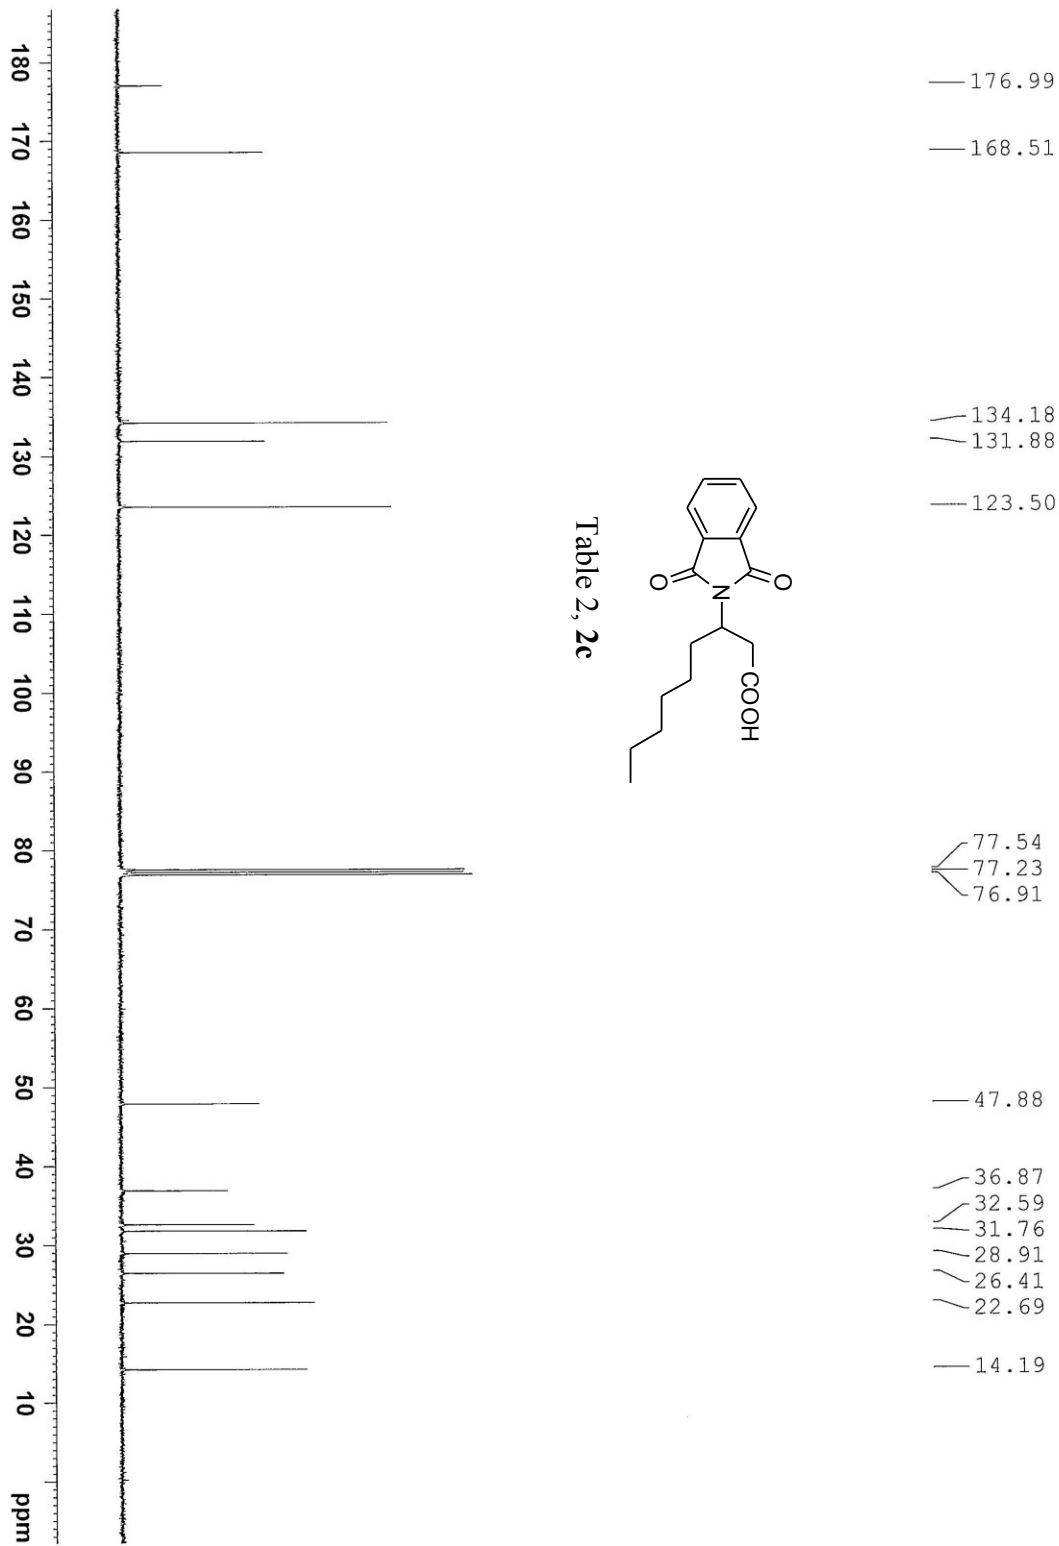

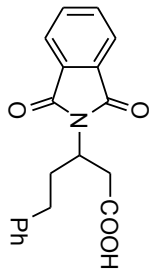

Table 2, **2d**

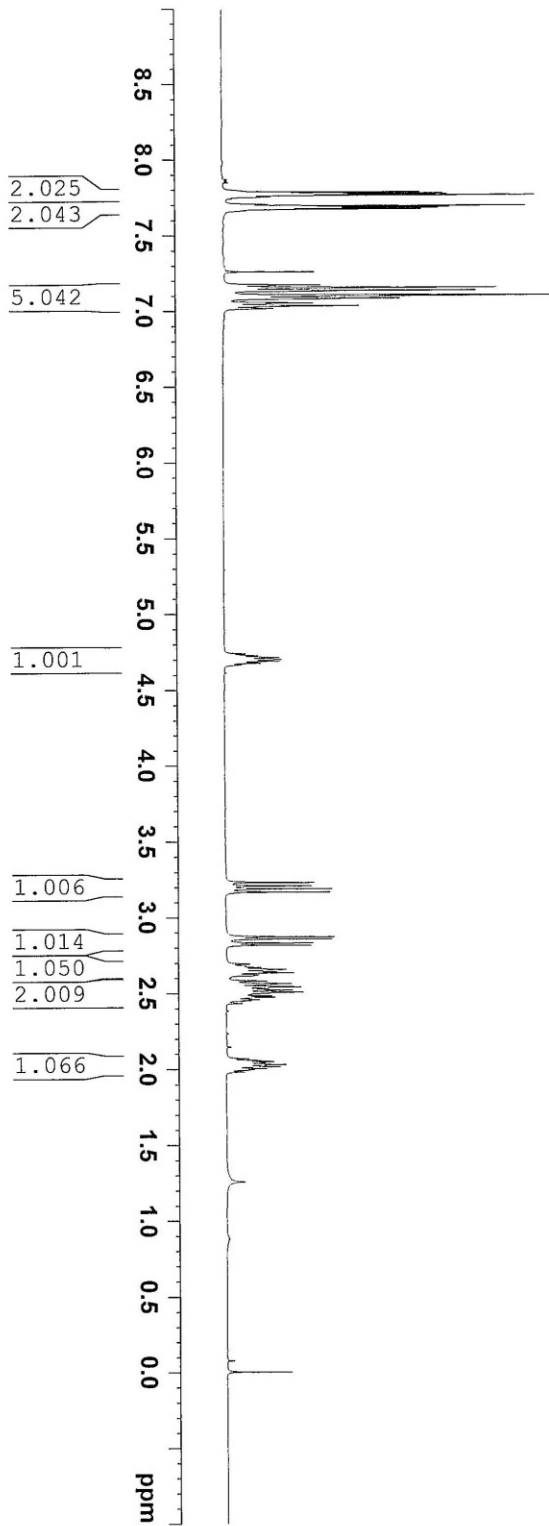

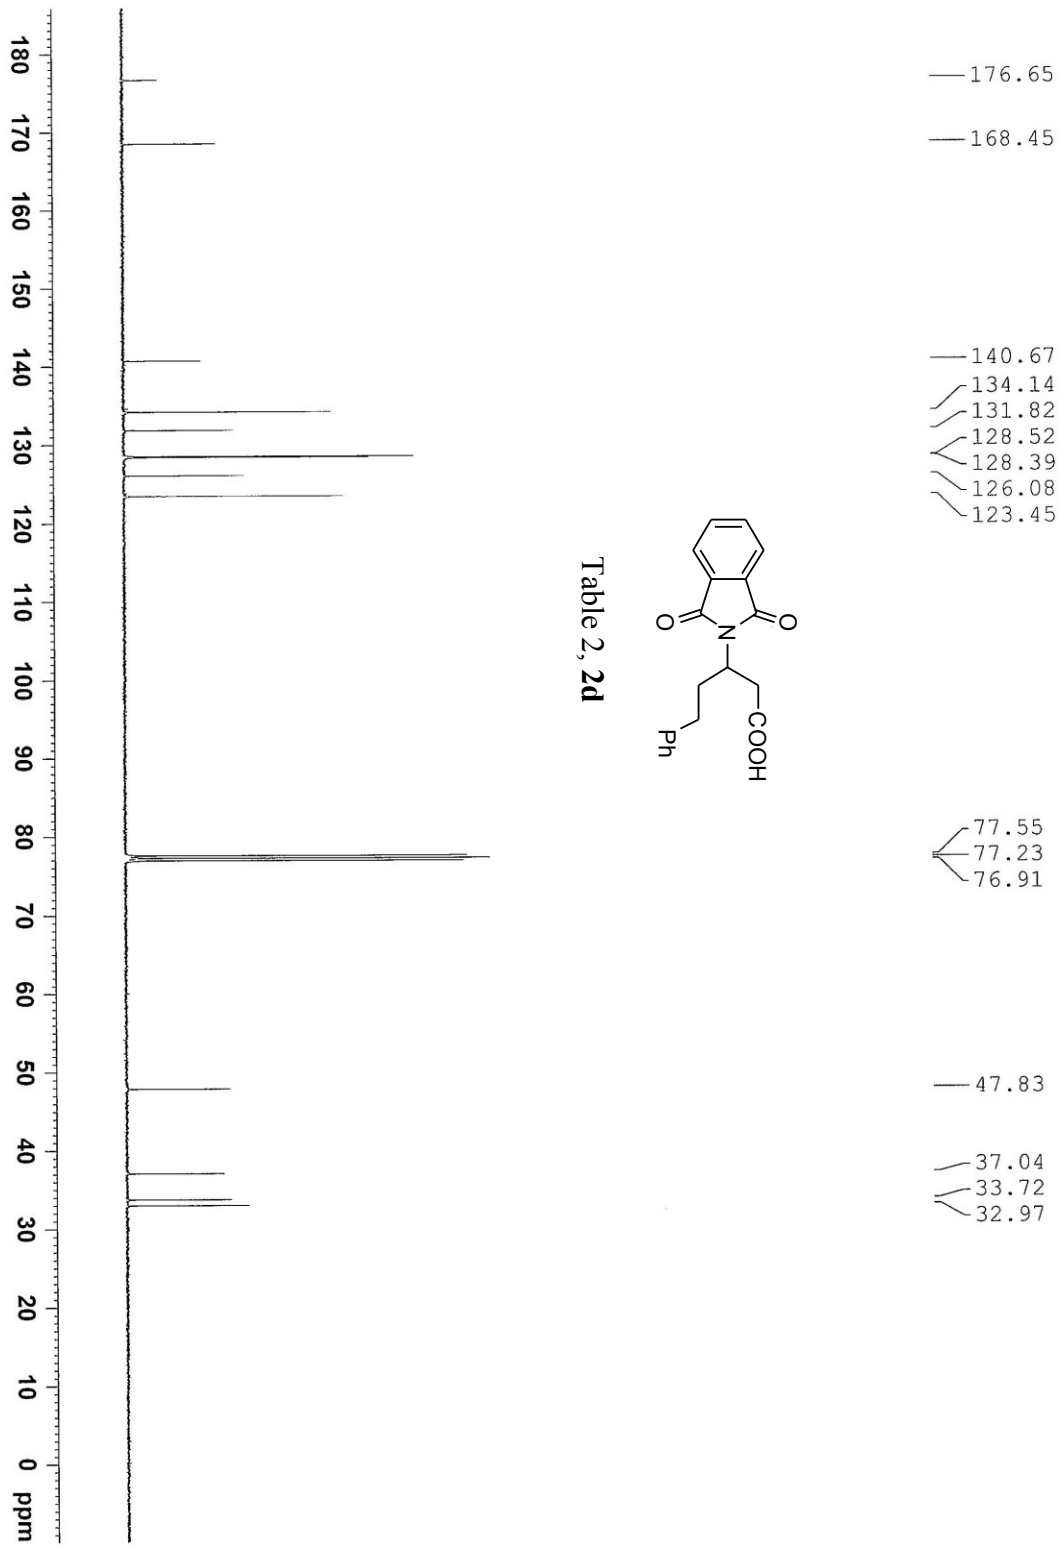

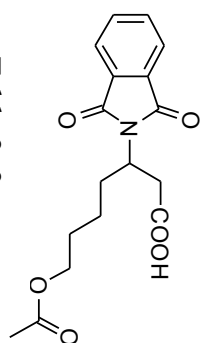

Table 2, 2e

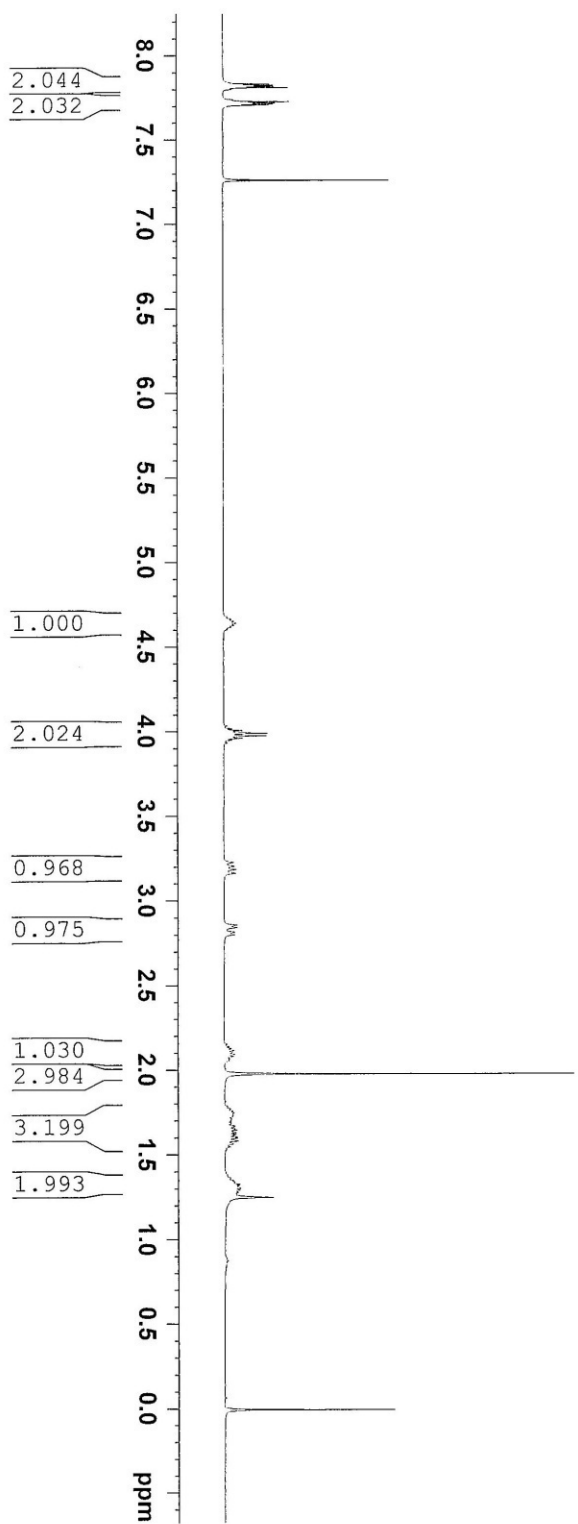

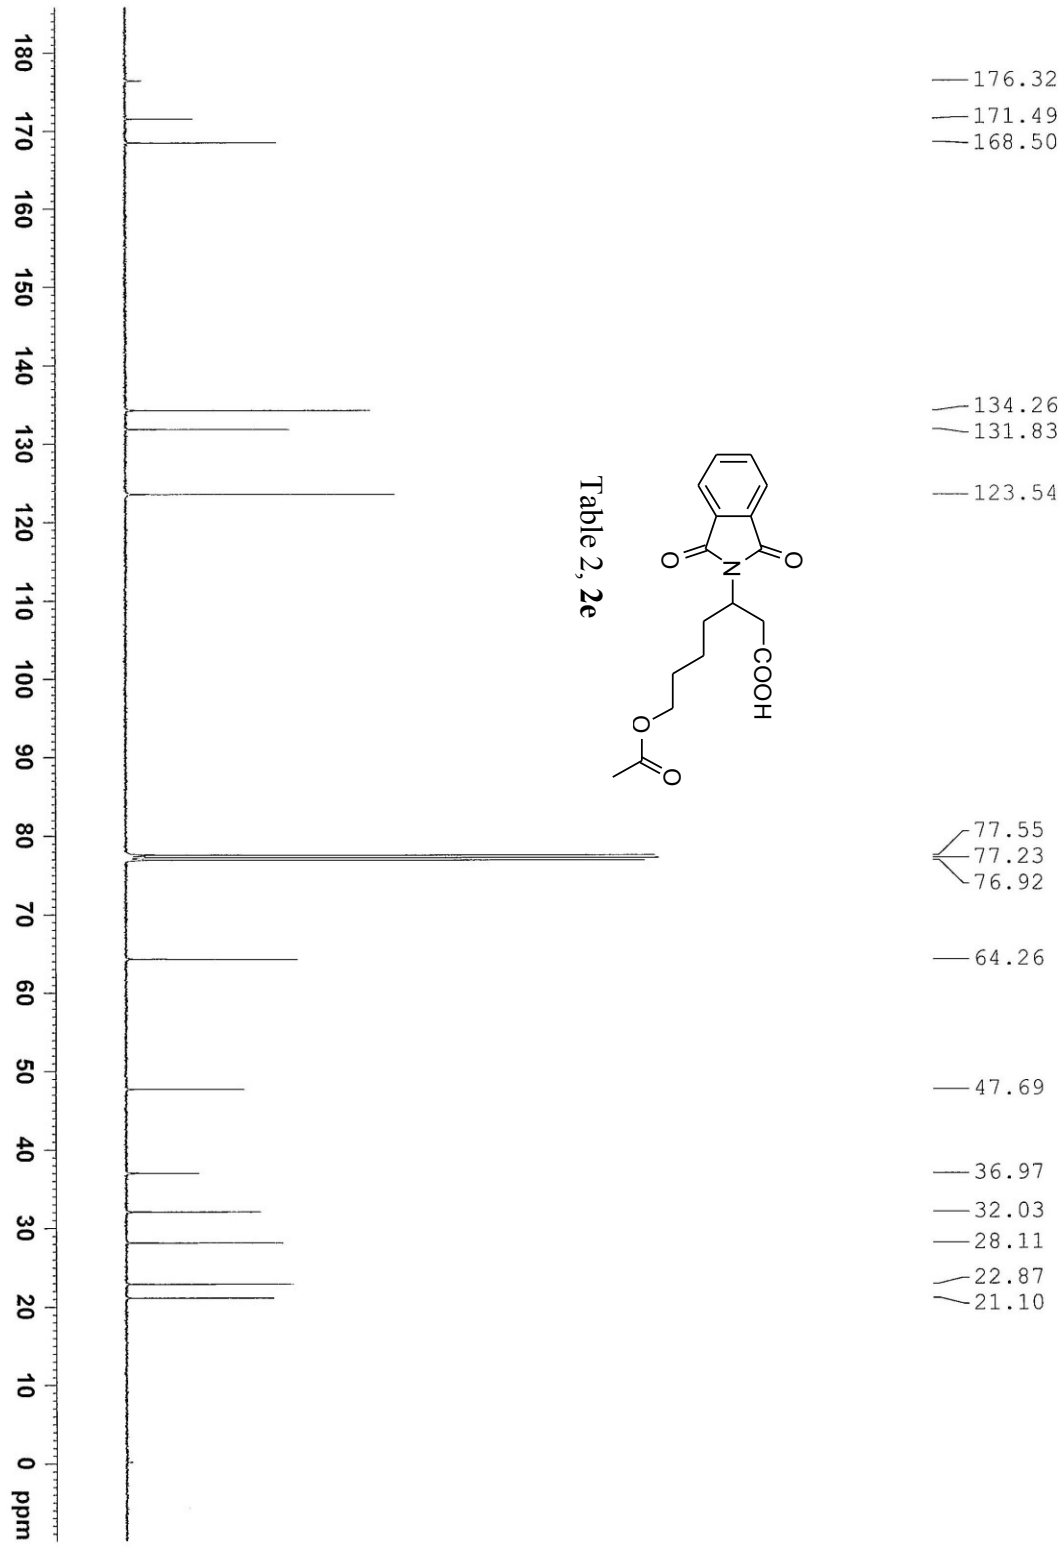

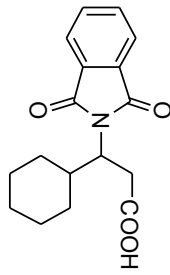

Table 2, 2f

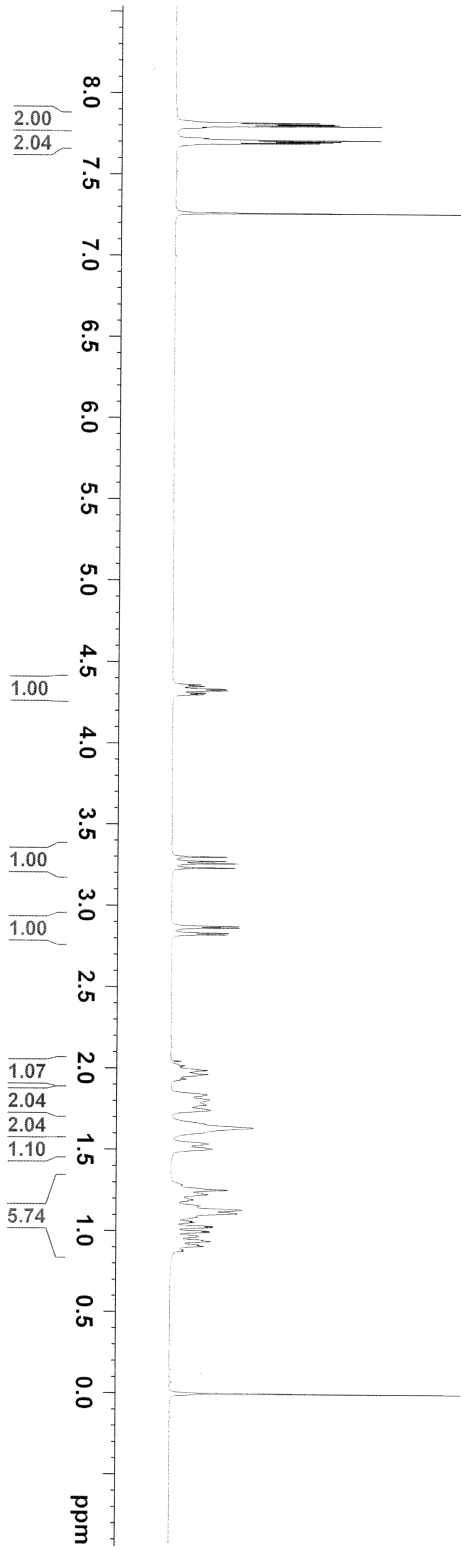

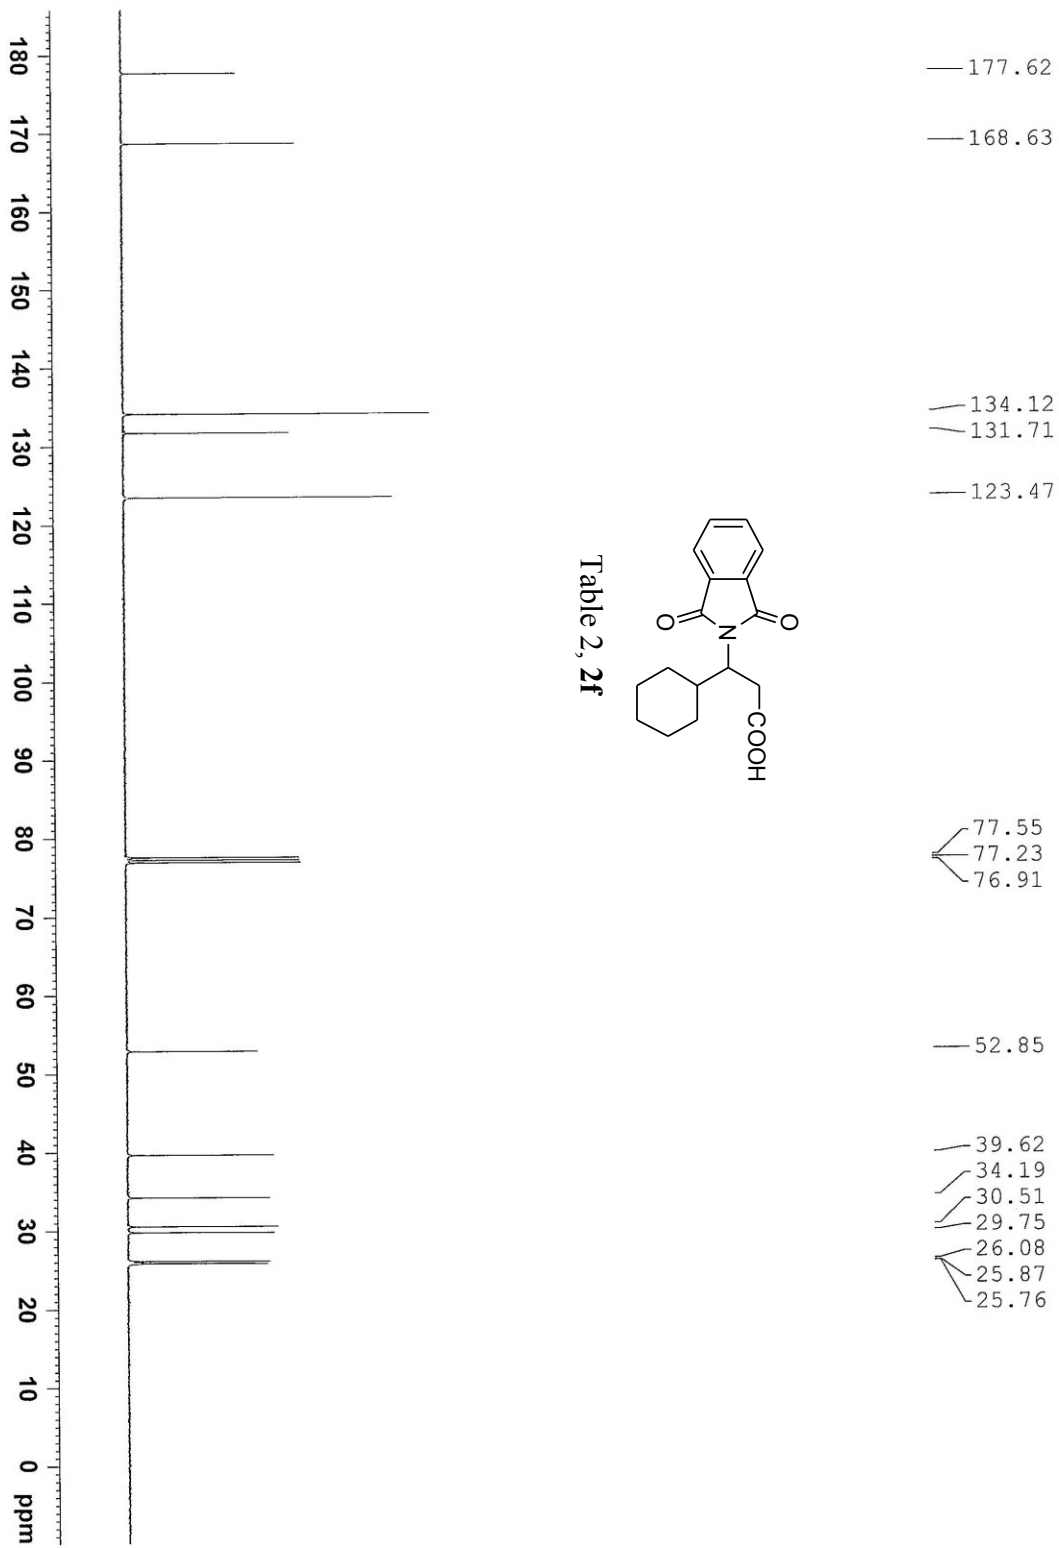

Table 2, 2f

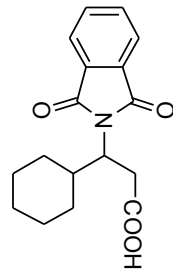



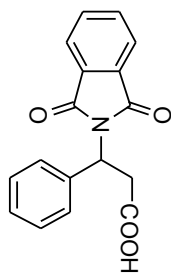

Table 2, **2g**

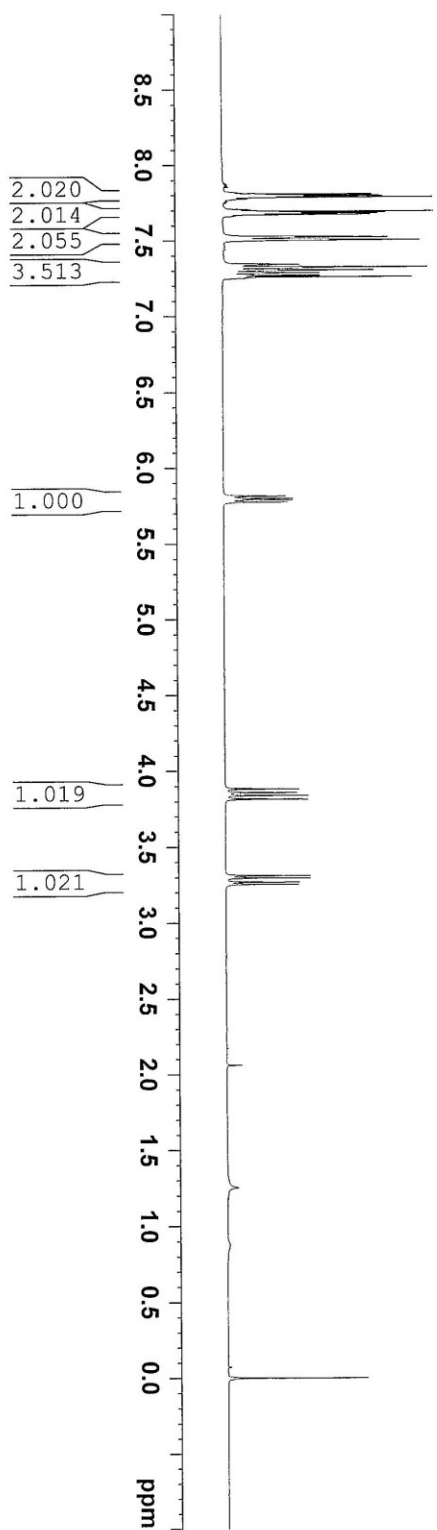

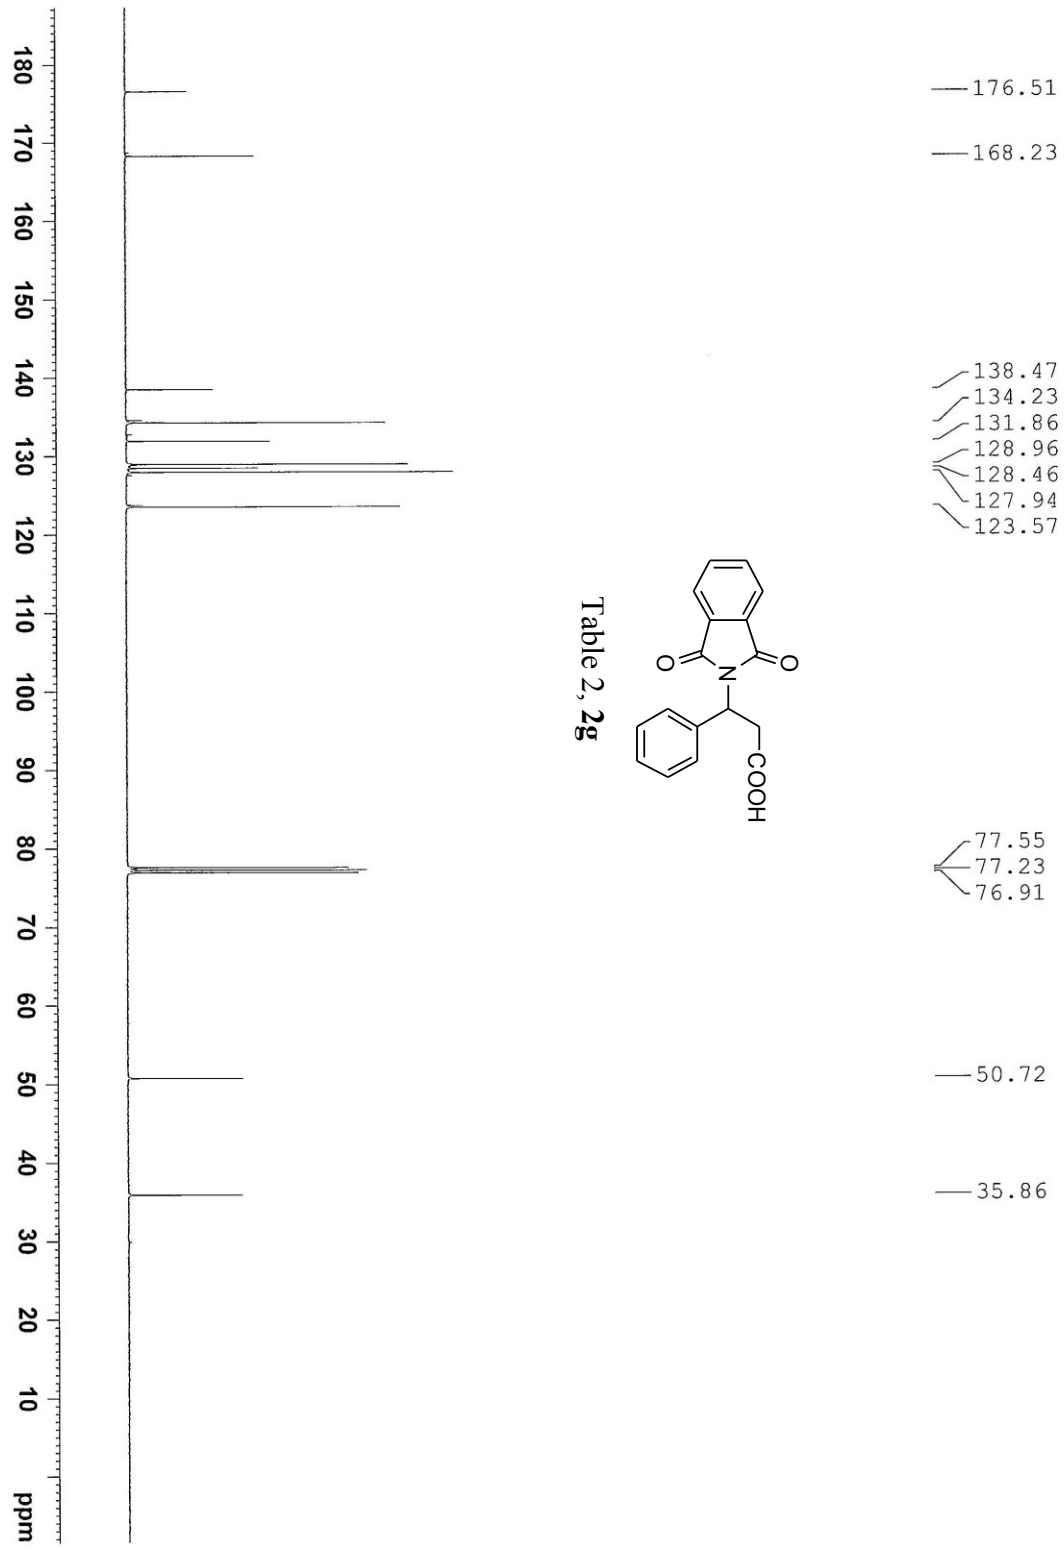

Table 2, 2g

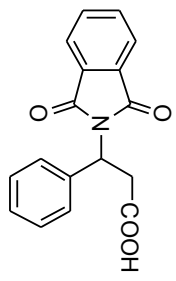

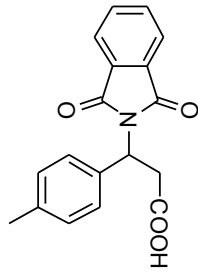

Table 2, 2h

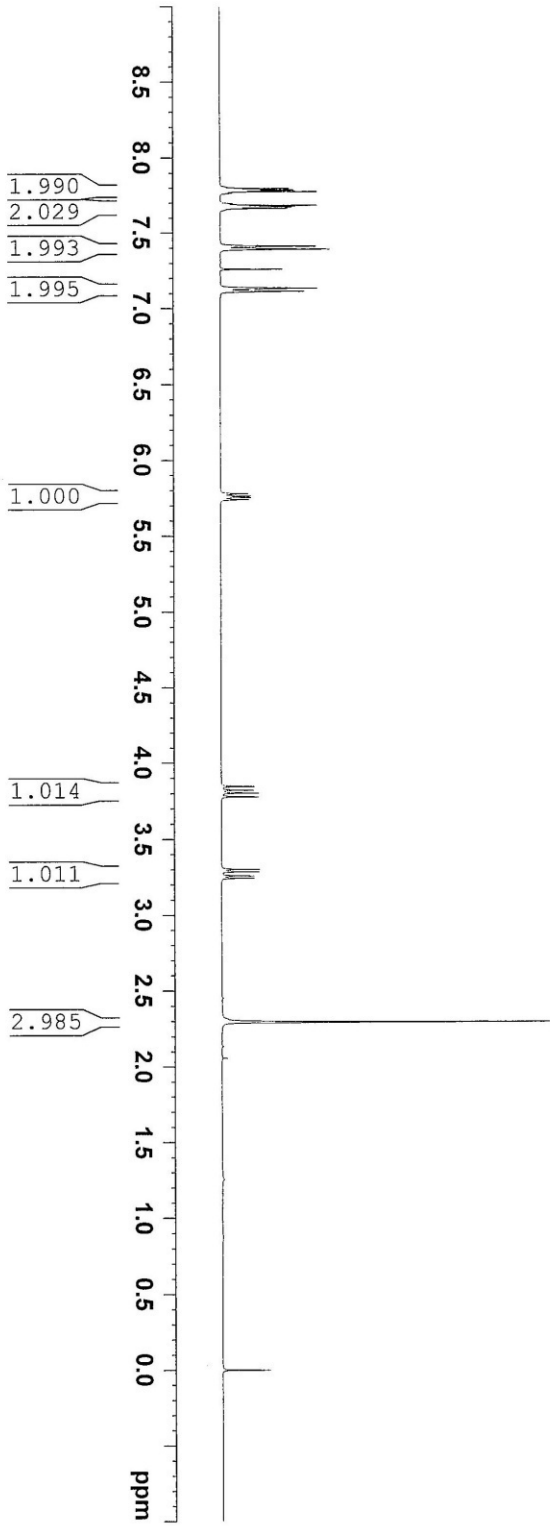

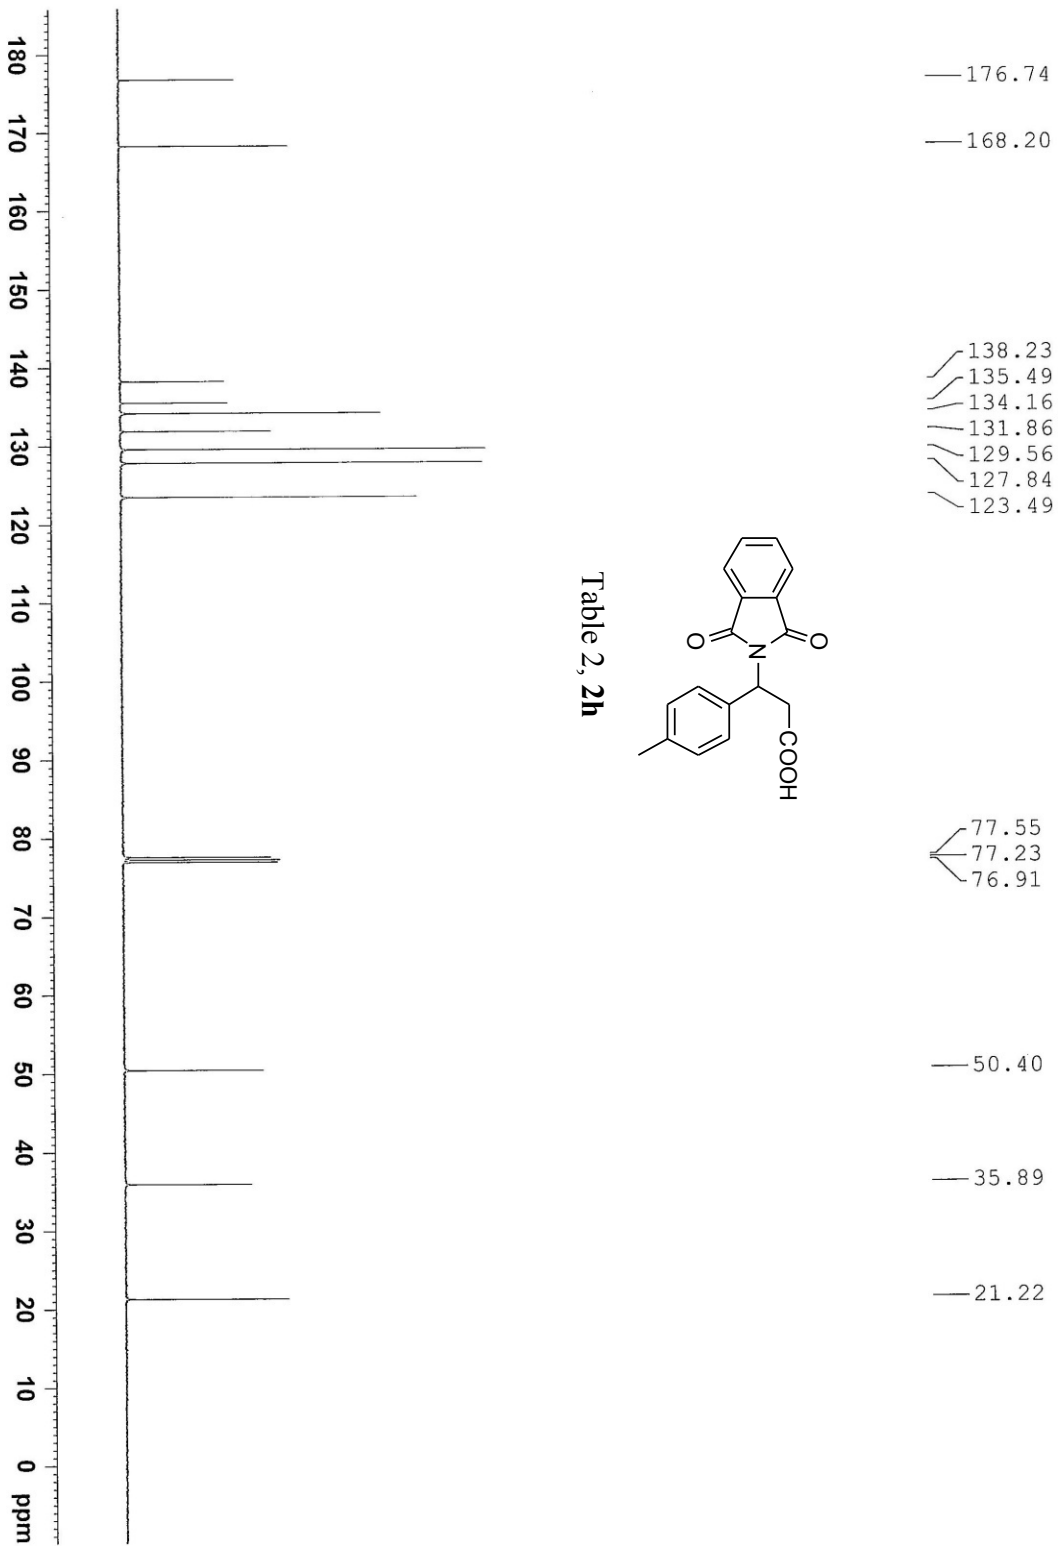

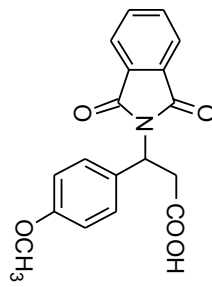

Table 2, **2i**

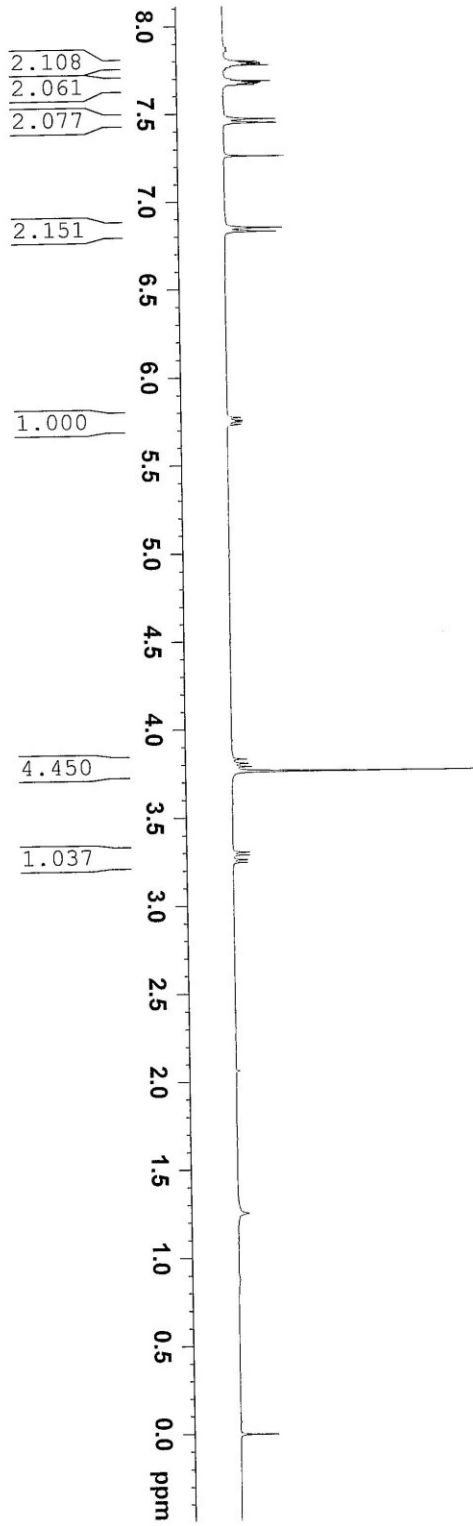

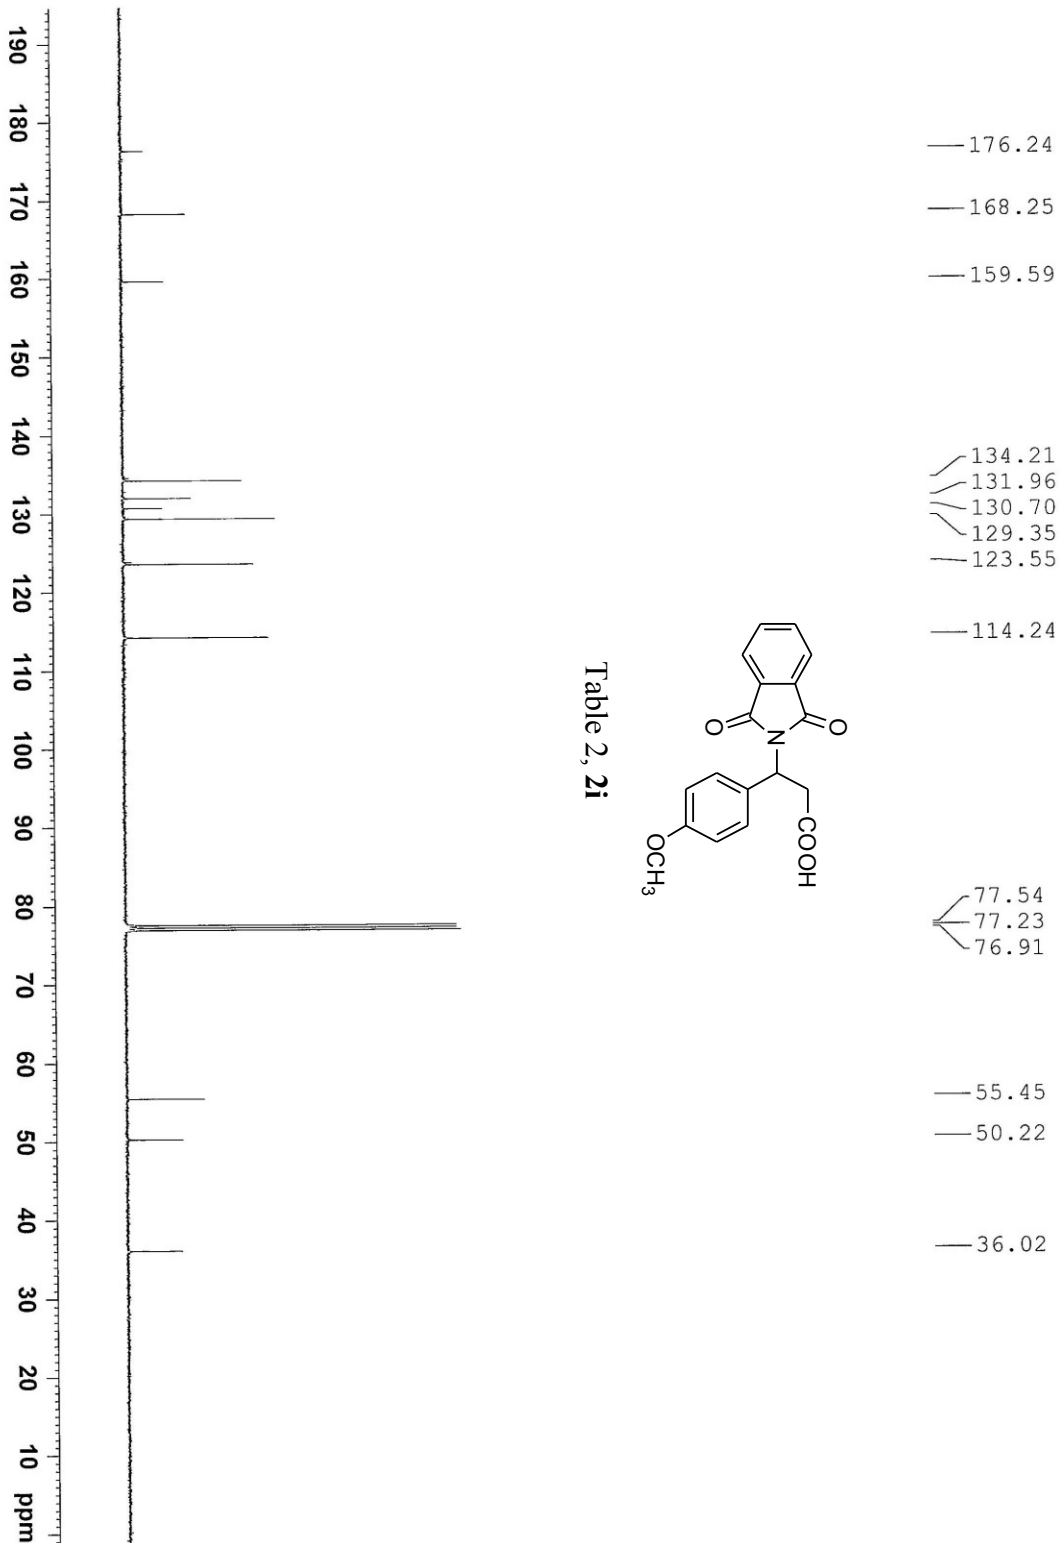

Table 2, 2i

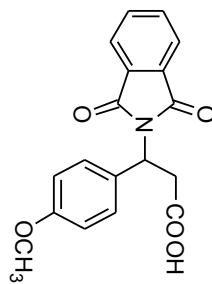

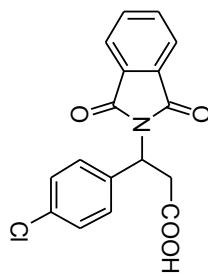

Table 2, 2j

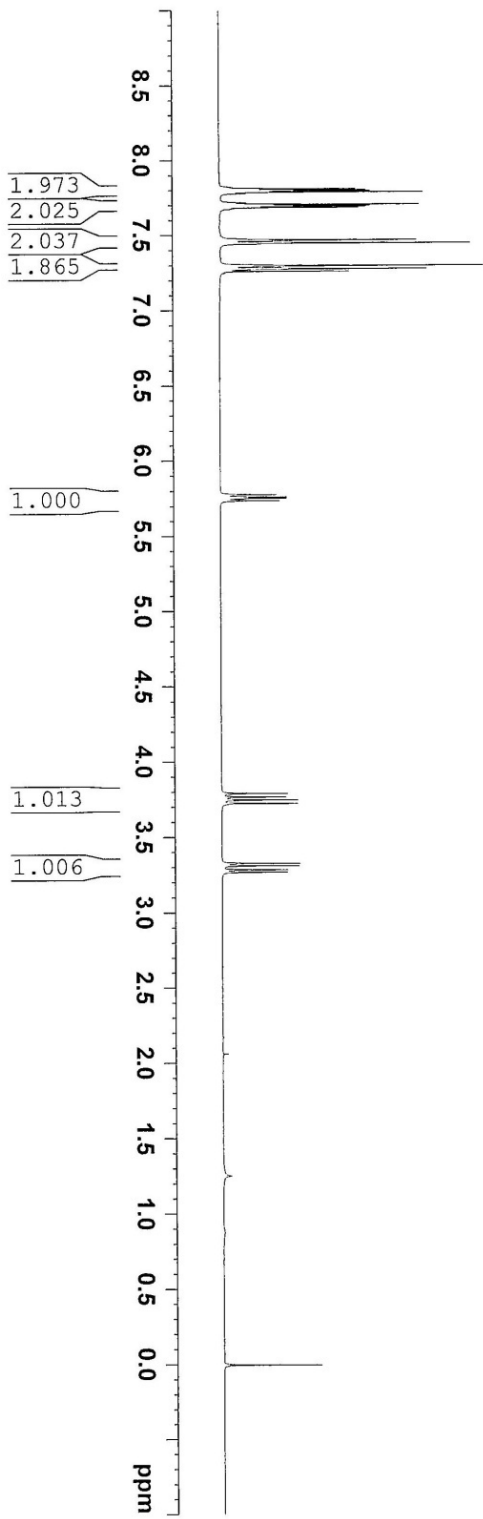

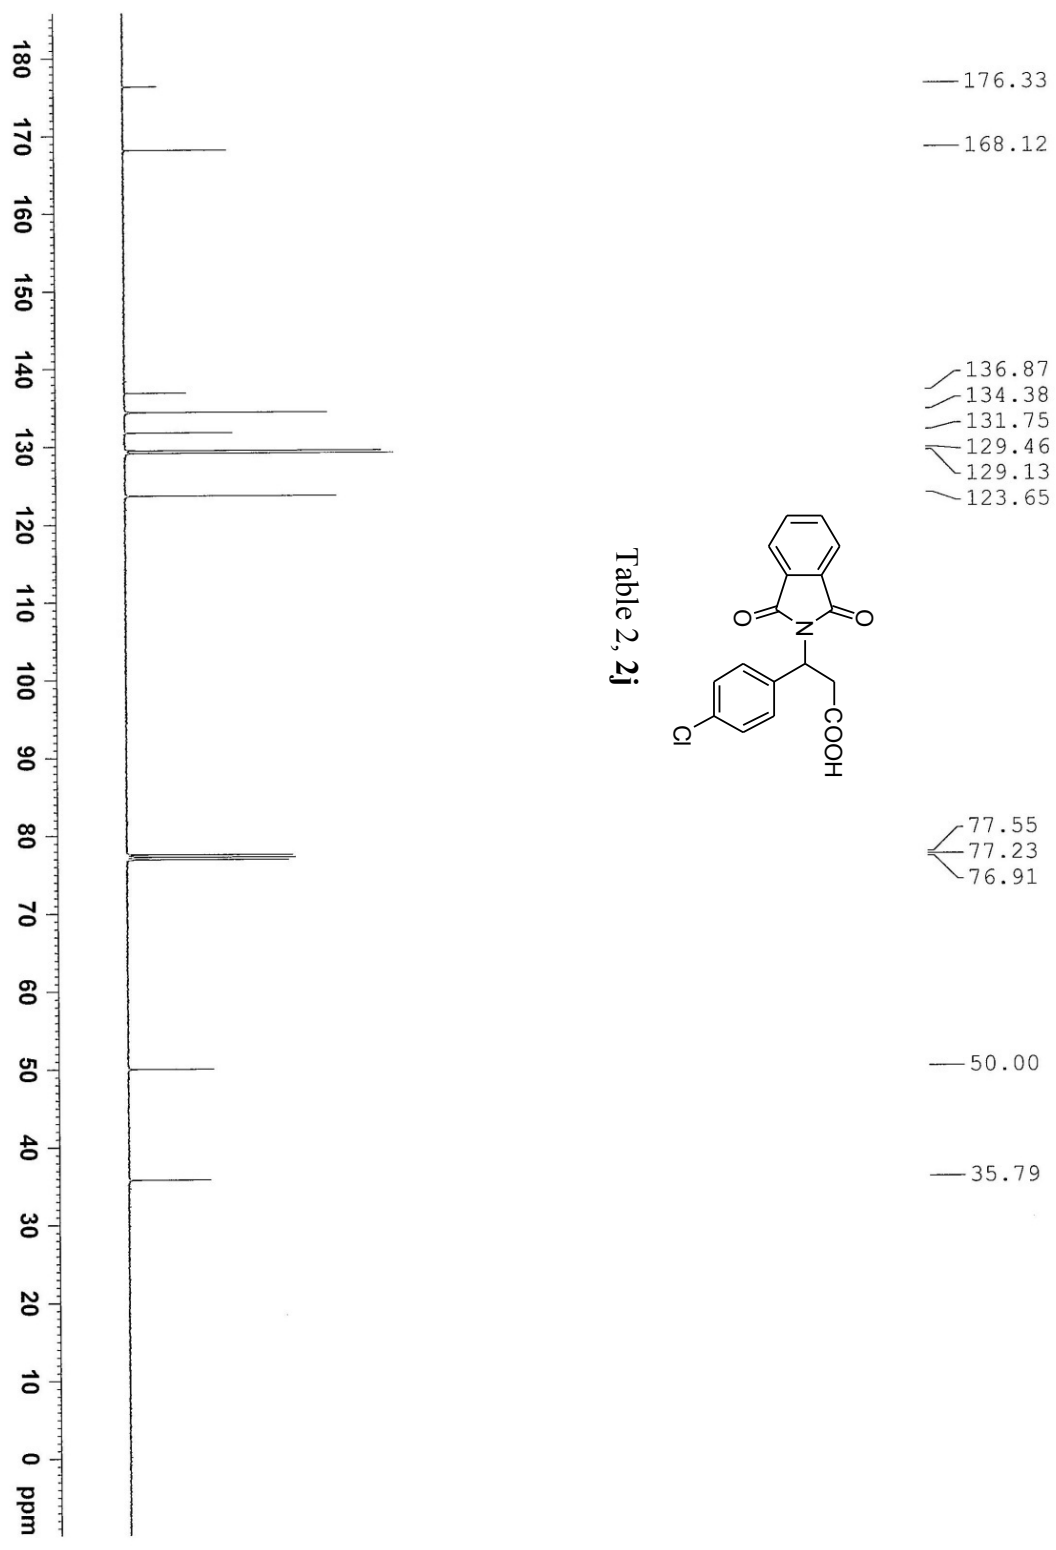



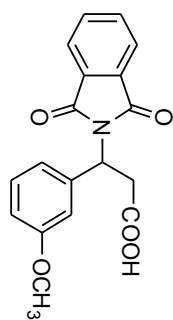

Table 2, 2k

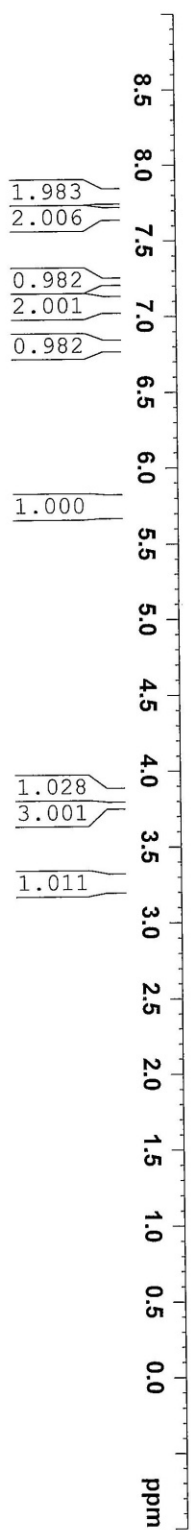

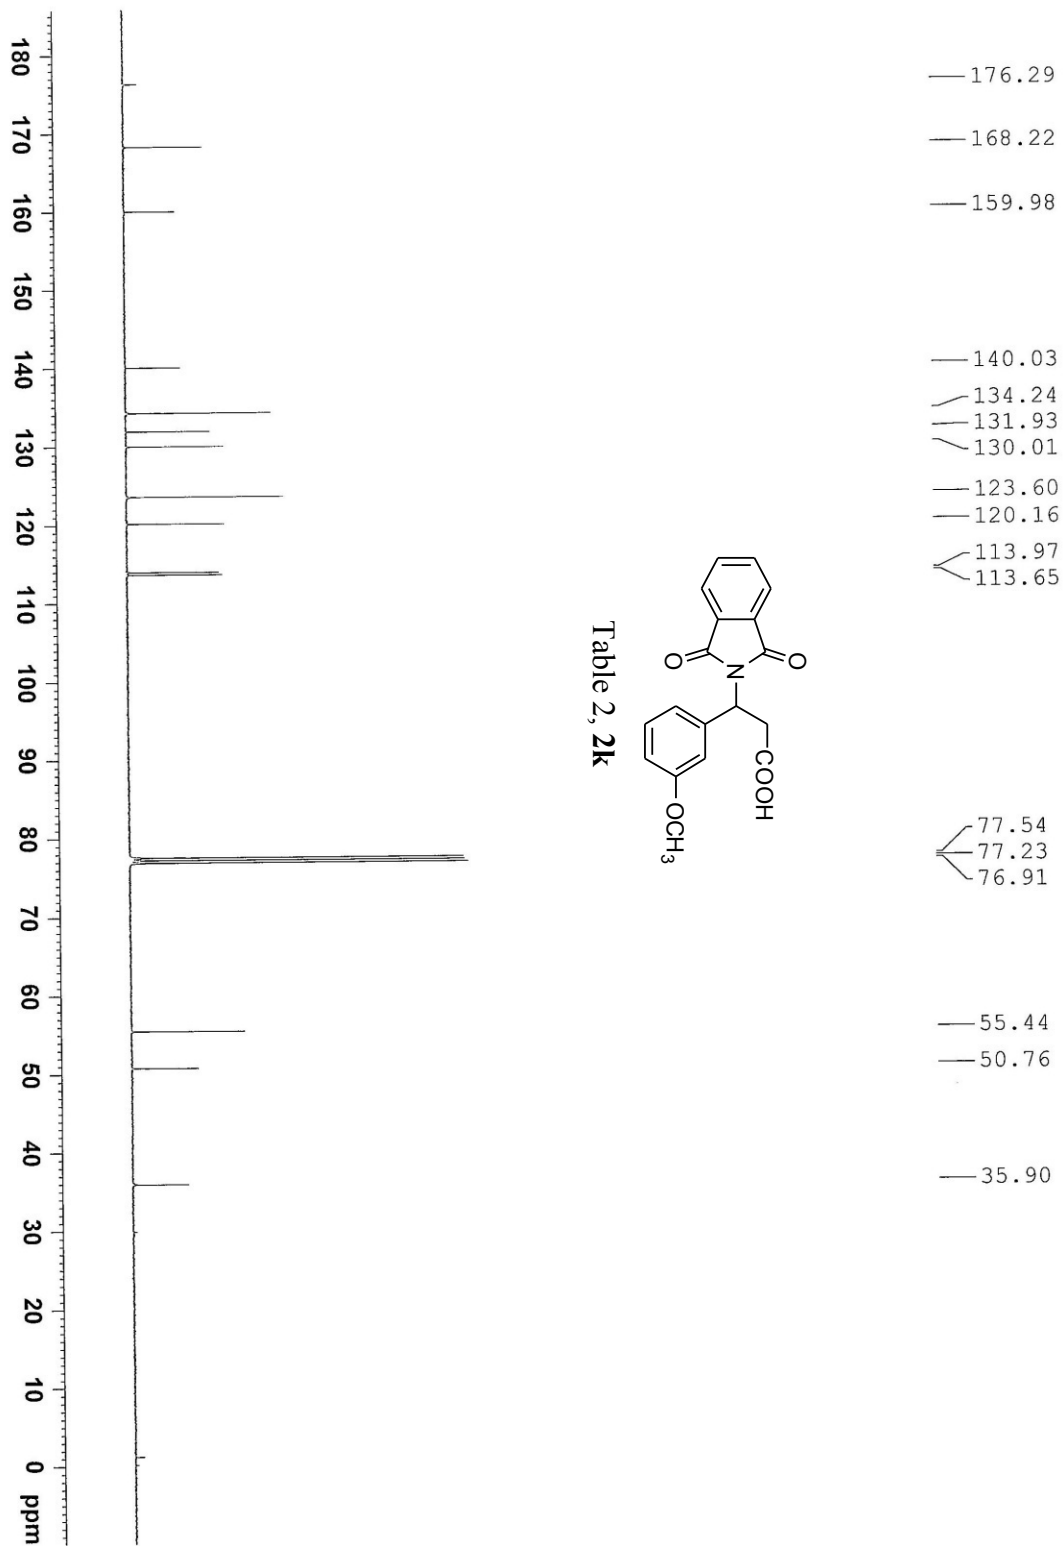

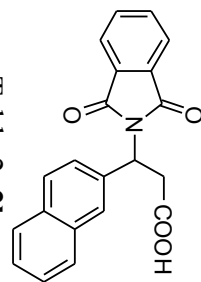

Table 2, 21

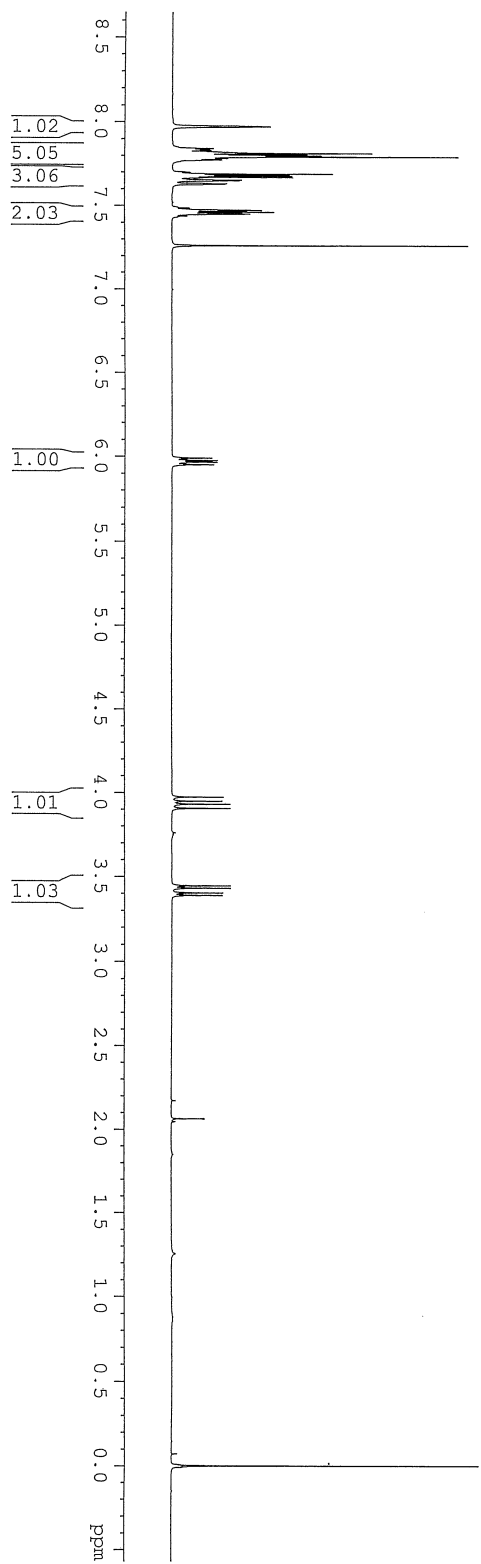

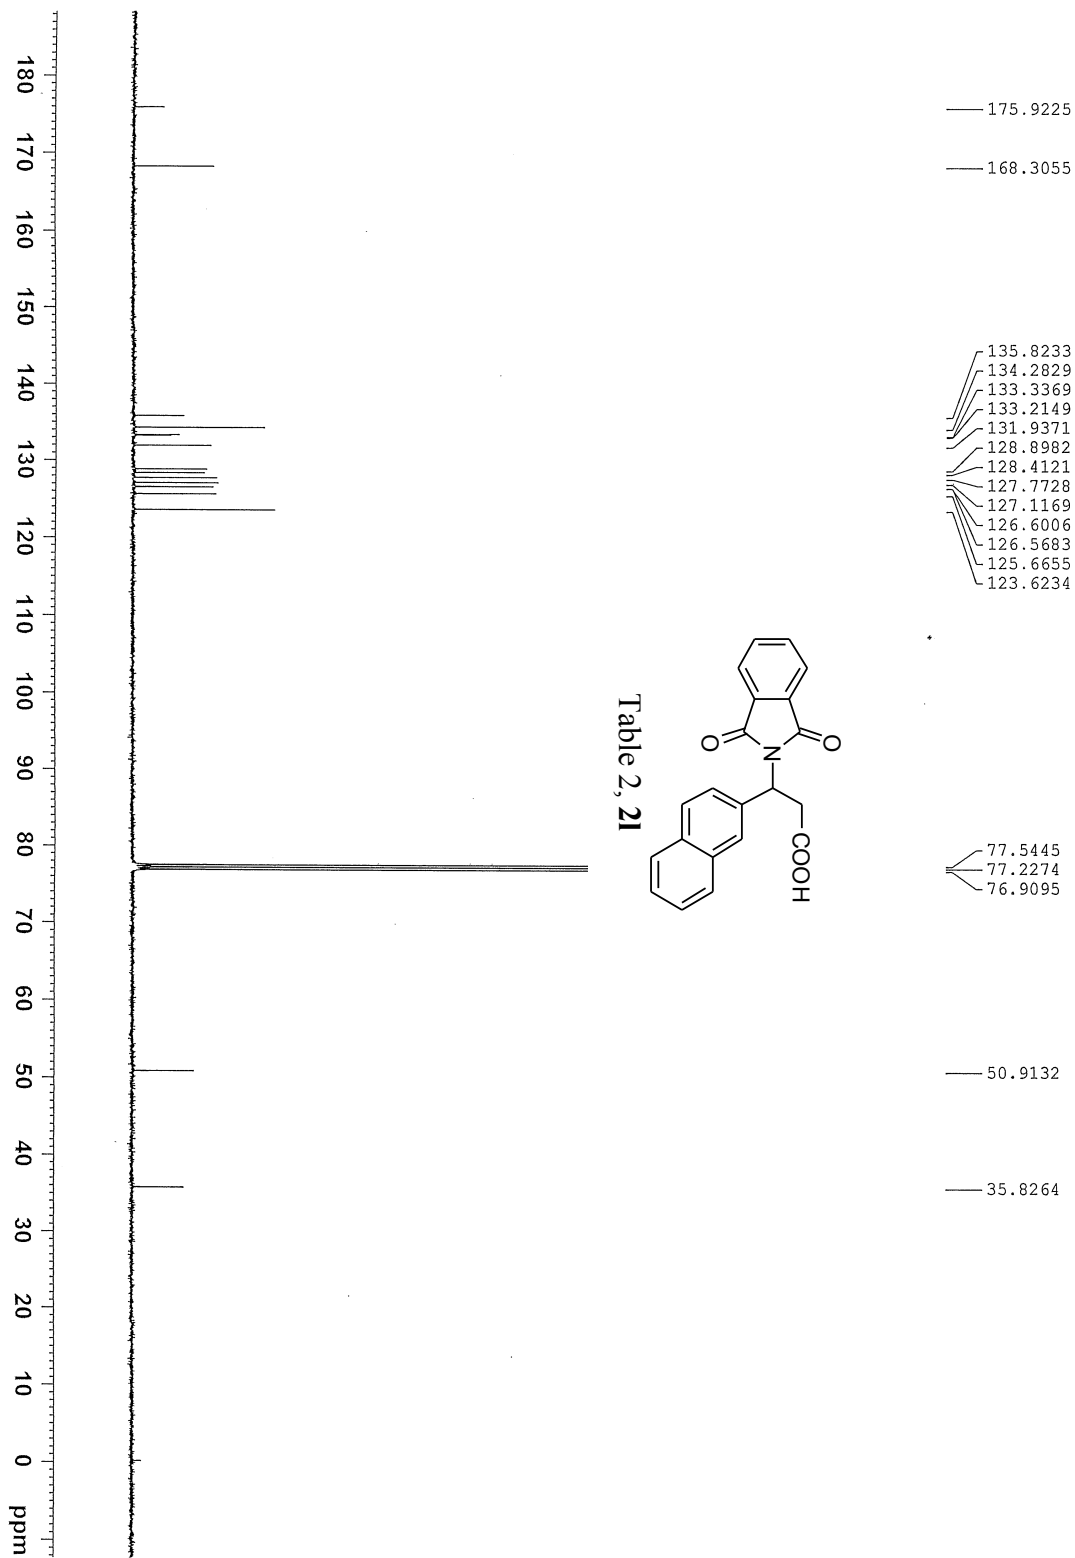

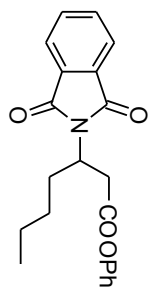

Table 1, Entry 18

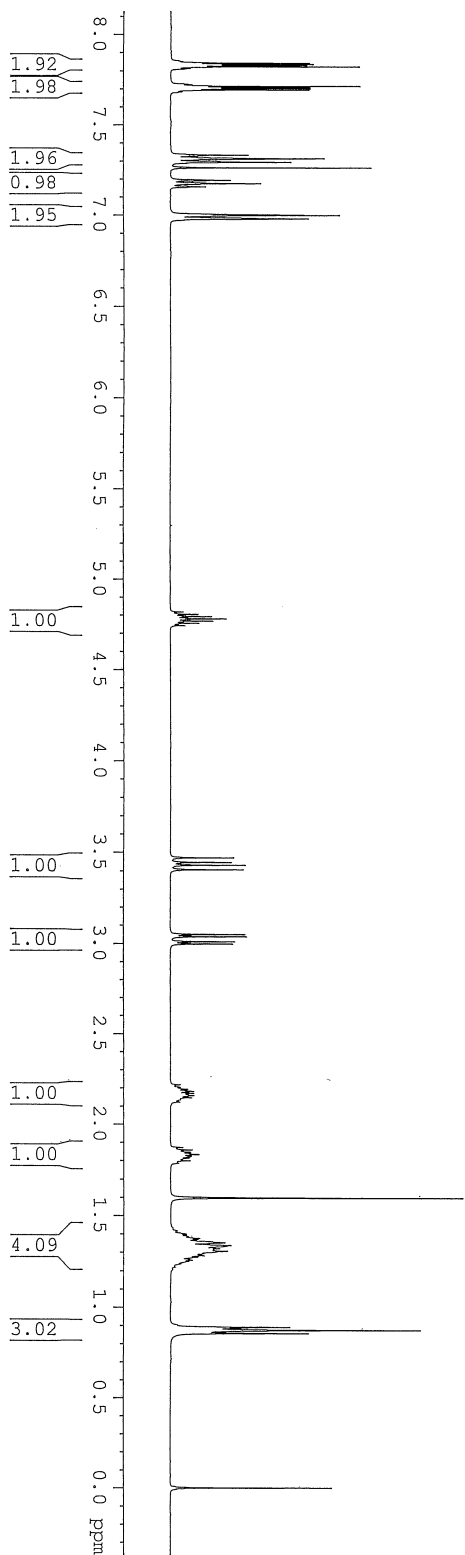

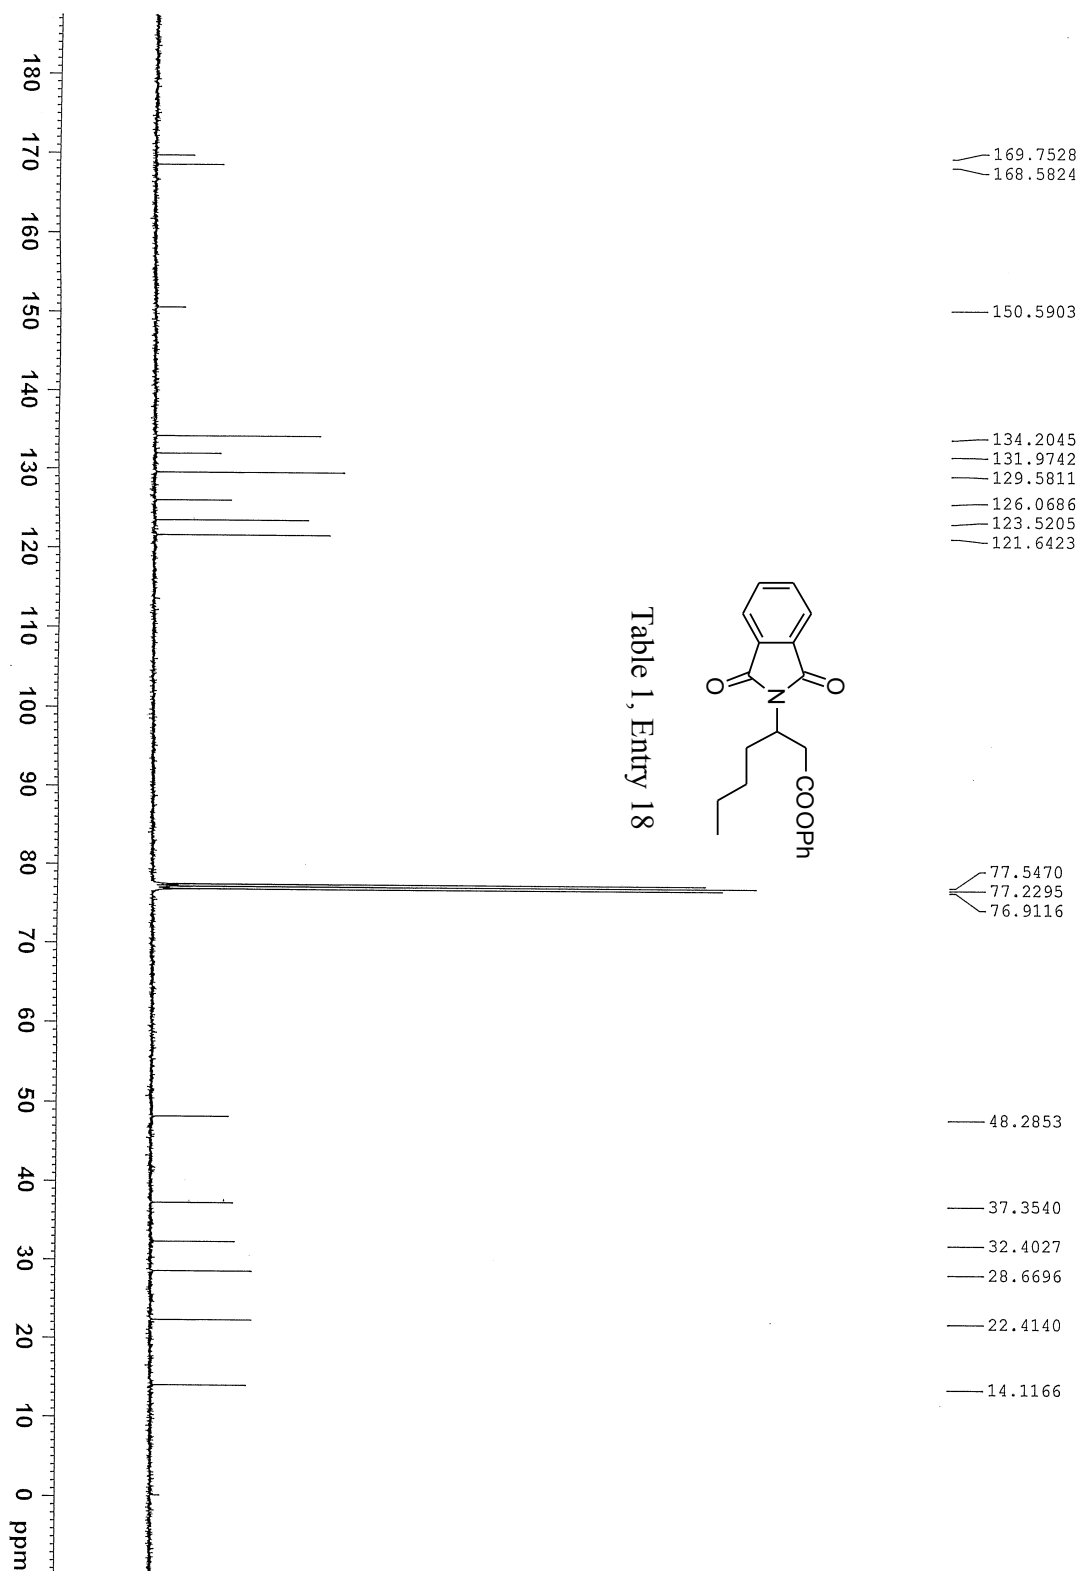

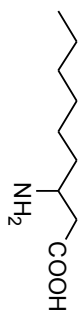

Scheme 3, **3c**

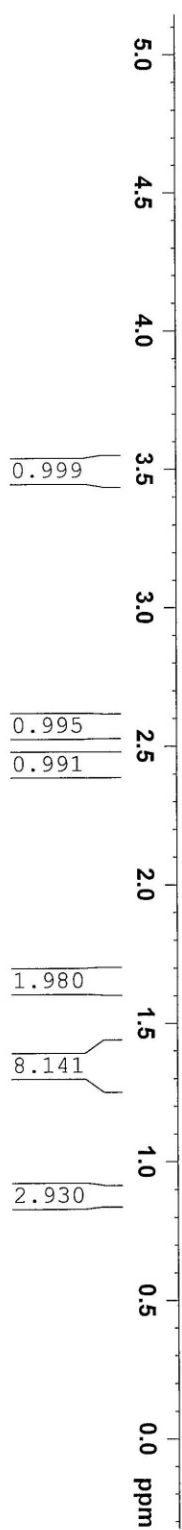

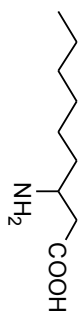

Scheme 3, **3c**

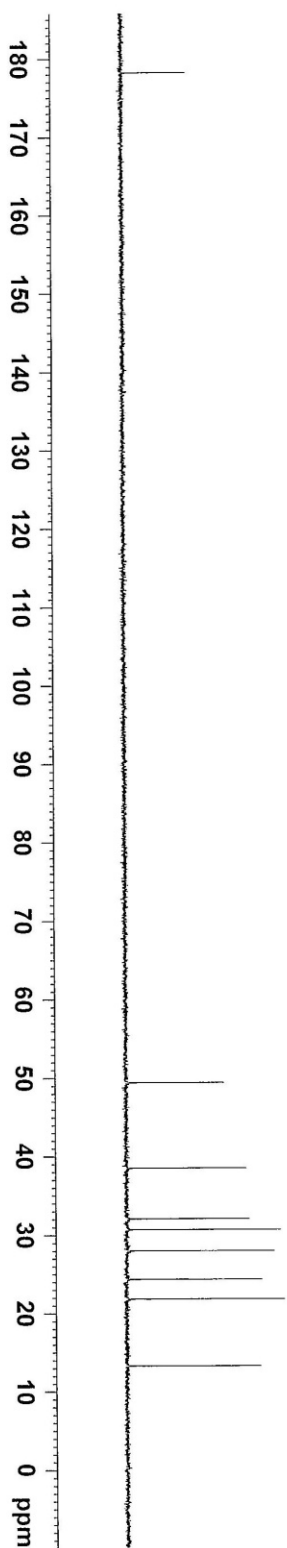

Supplement: c5ob01304f1.pdf [file c5ob01304f1.pdf]
